# Supplementary material for: Triphenylamine–boron complexes: molecular thermometry and alkyl chain controlled molecular fluorescent liquids
Source: Royal Society of Chemistry journal article supplement (doi:10.1039/d2nj04474a), 2023-01-01
Supplement: d2nj04474a1.pdf [file d2nj04474a1.pdf]

### Electronic Supplementary Information (ESI)

#### Triphenylamine-boron complexes: Molecular thermometer and alkyl chain controlled molecular fluorescent liquids

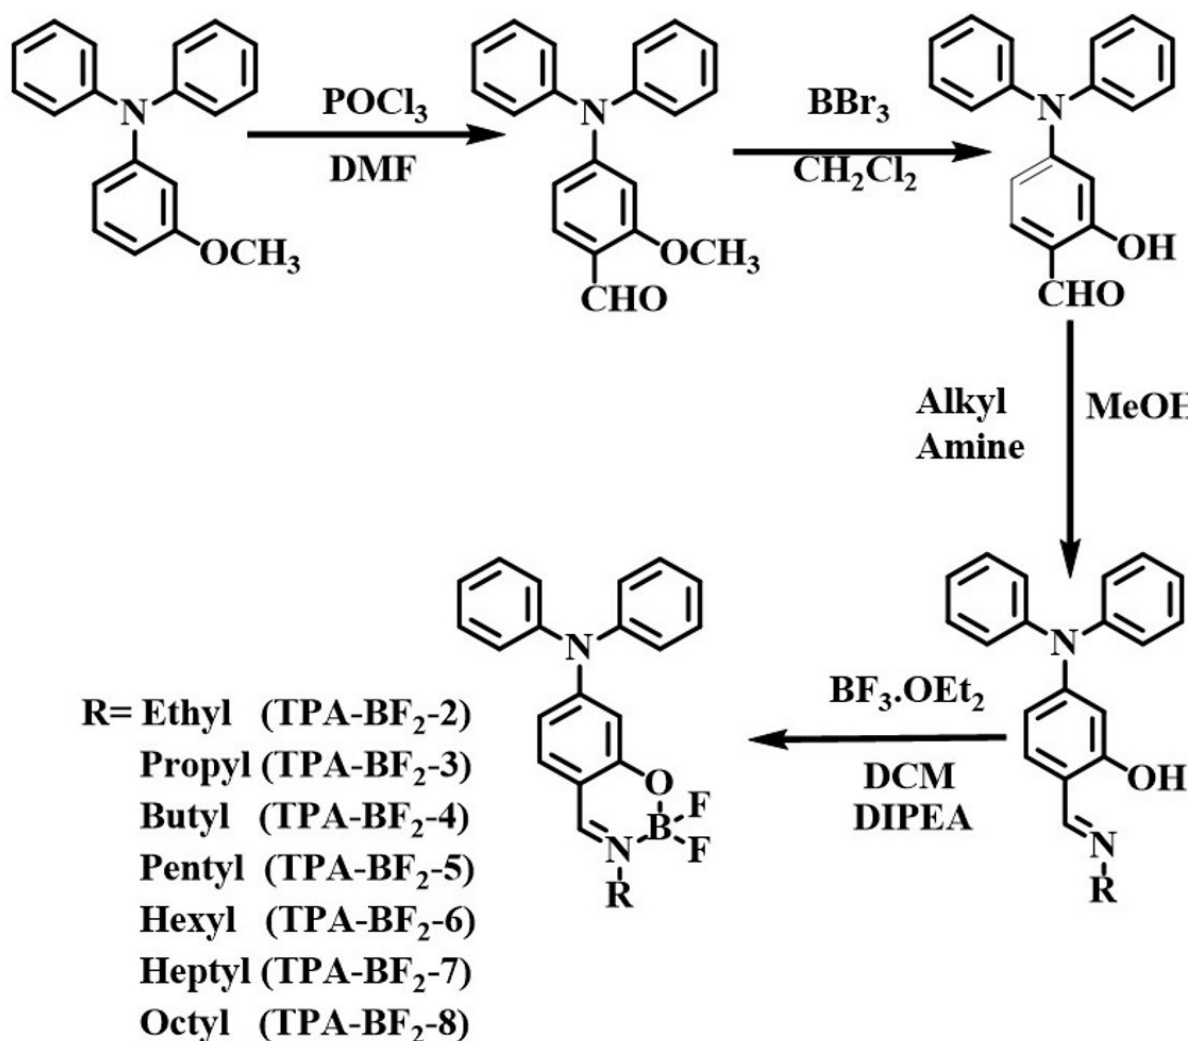

Scheme S1. Synthesis of TPA-BF<sub>2</sub> complexes.

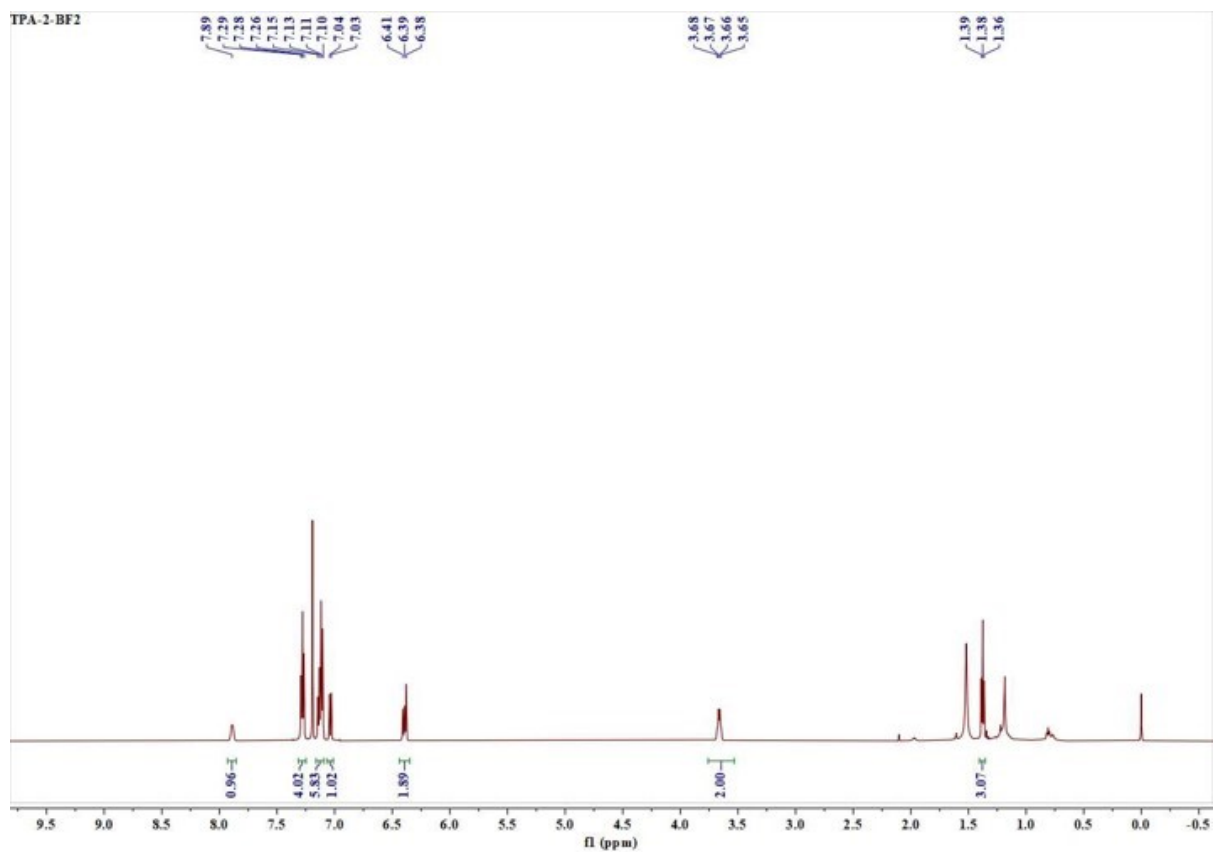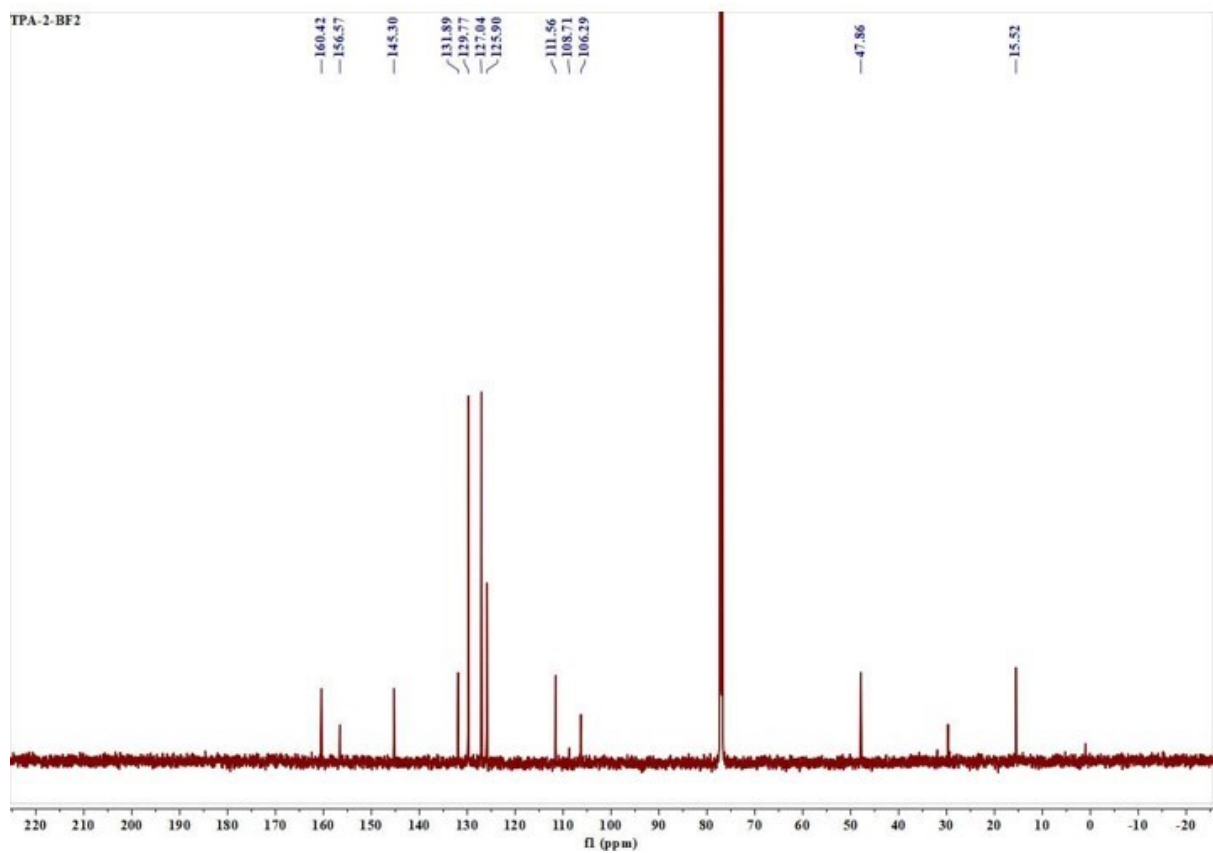

$^1\text{H}$  &  $^{13}\text{C}$  NMR of TPA-BF<sub>2</sub>-2

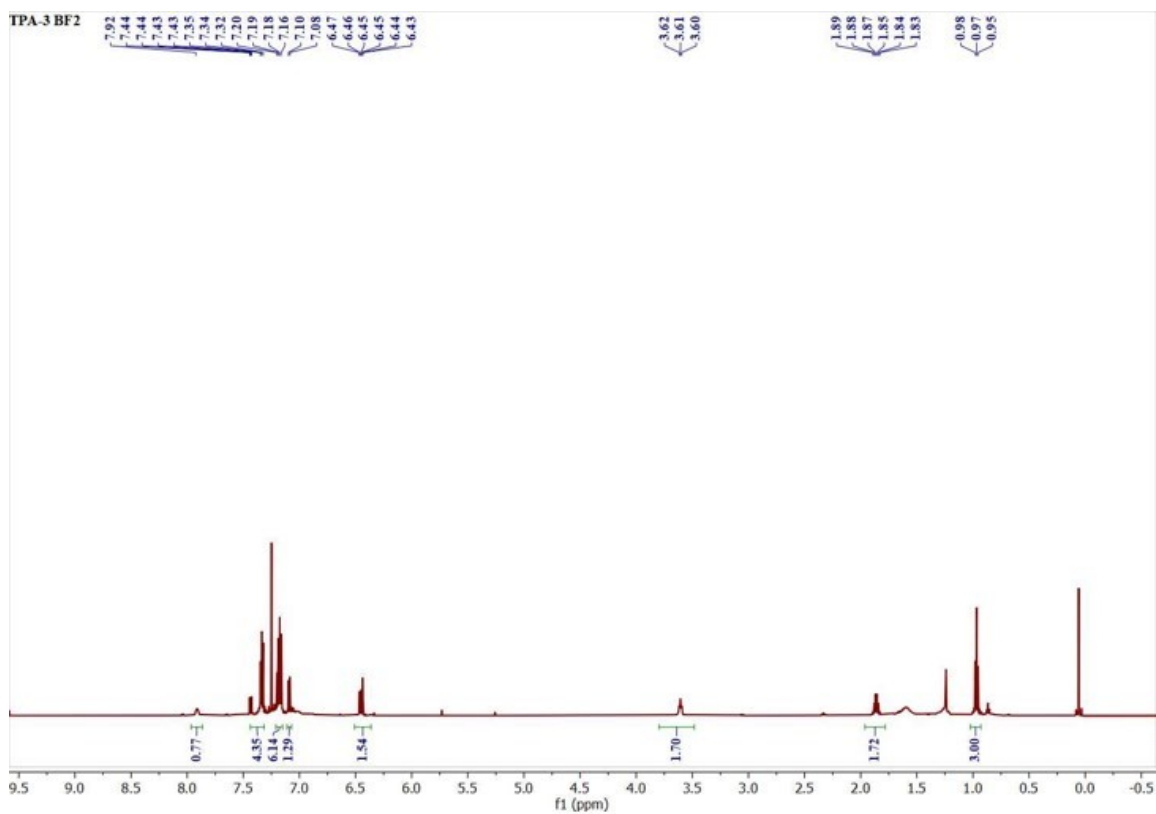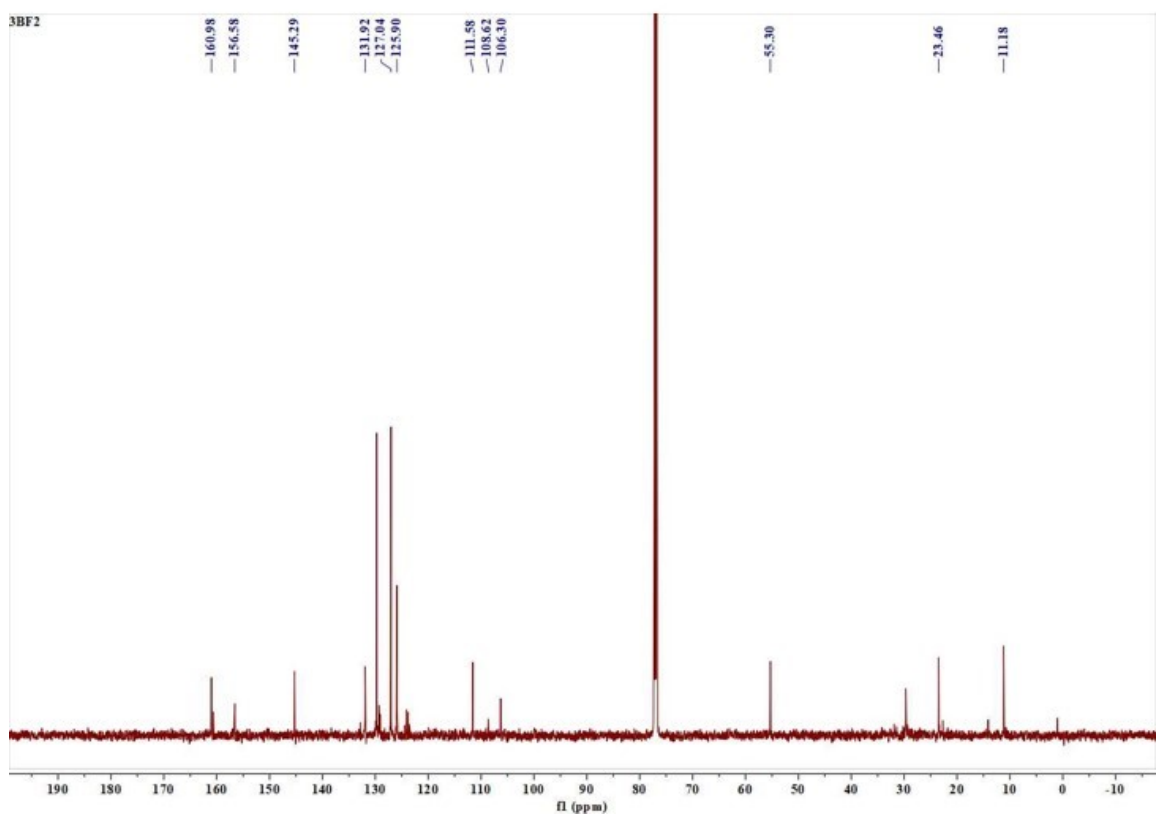

$^1\text{H}$  &  $^{13}\text{C}$  NMR of TPA-BF<sub>2</sub>-3

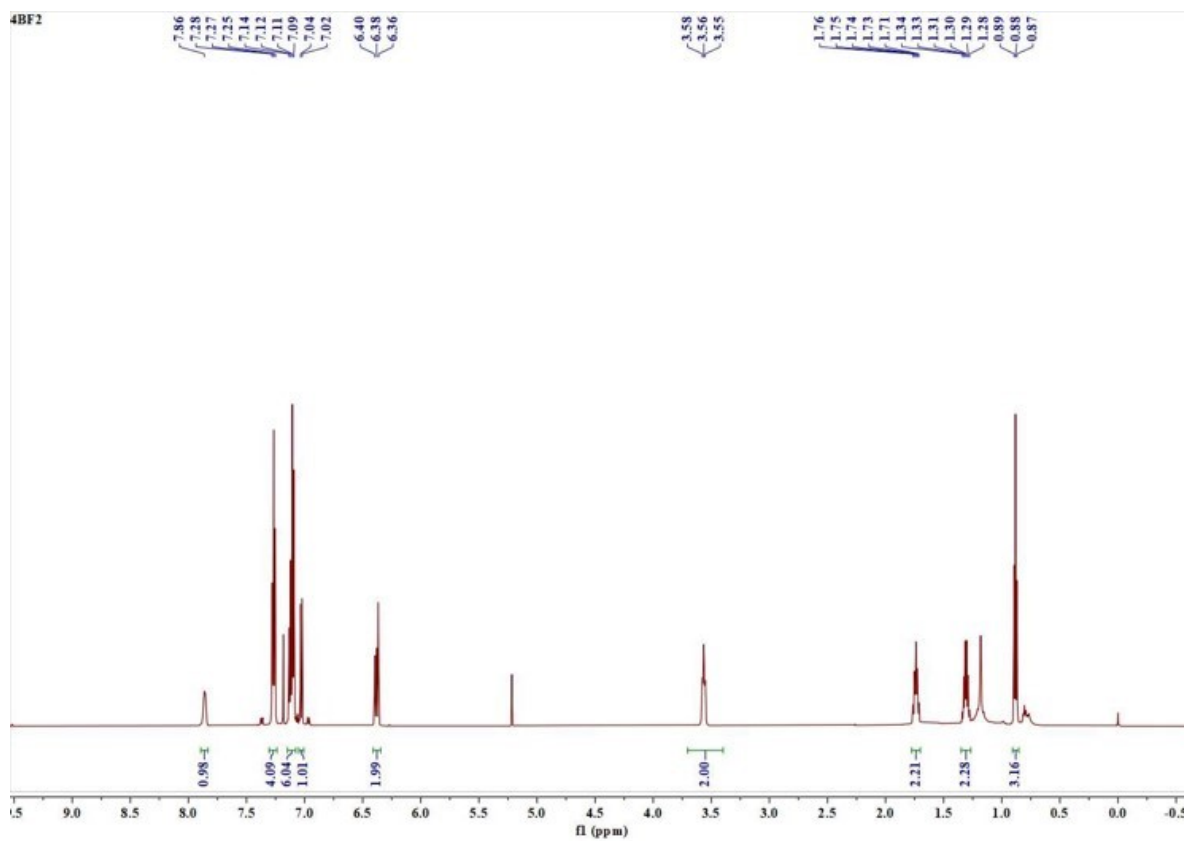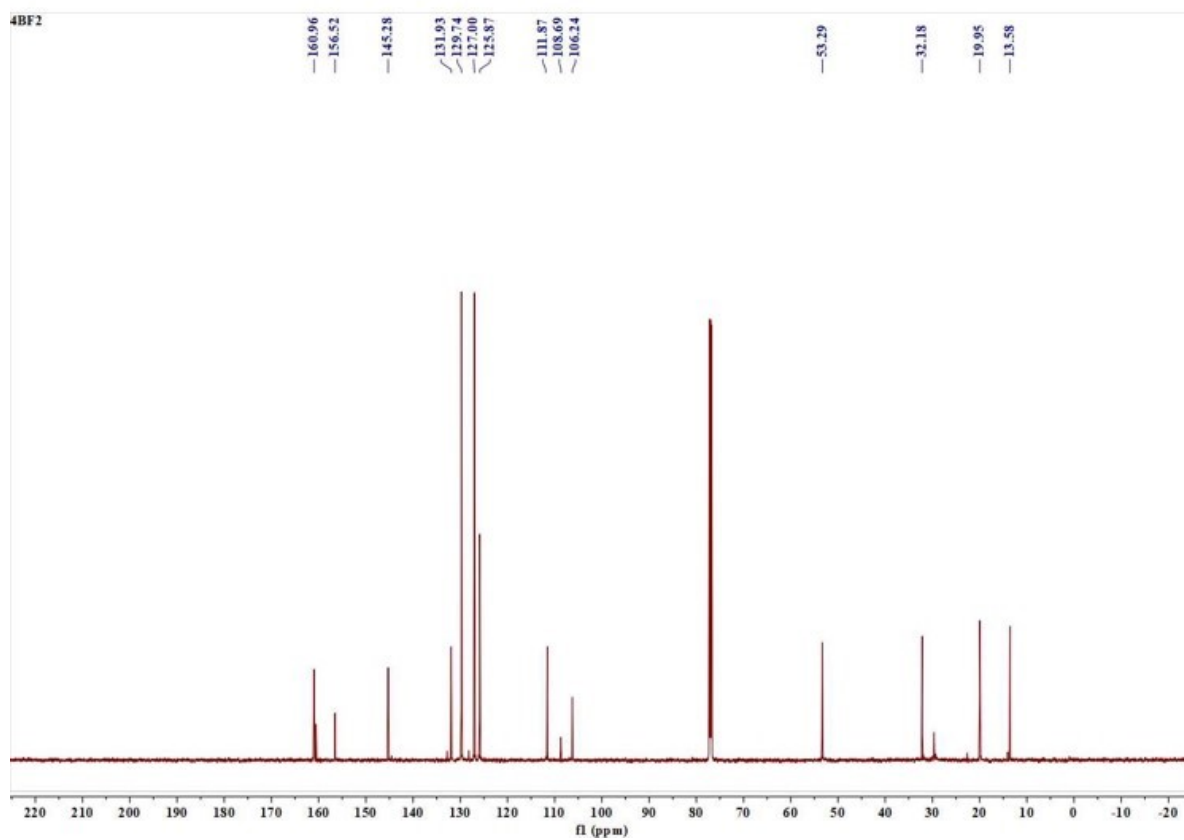

$^1\text{H}$  &  $^{13}\text{C}$  NMR of TPA- $\text{BF}_2$ -4

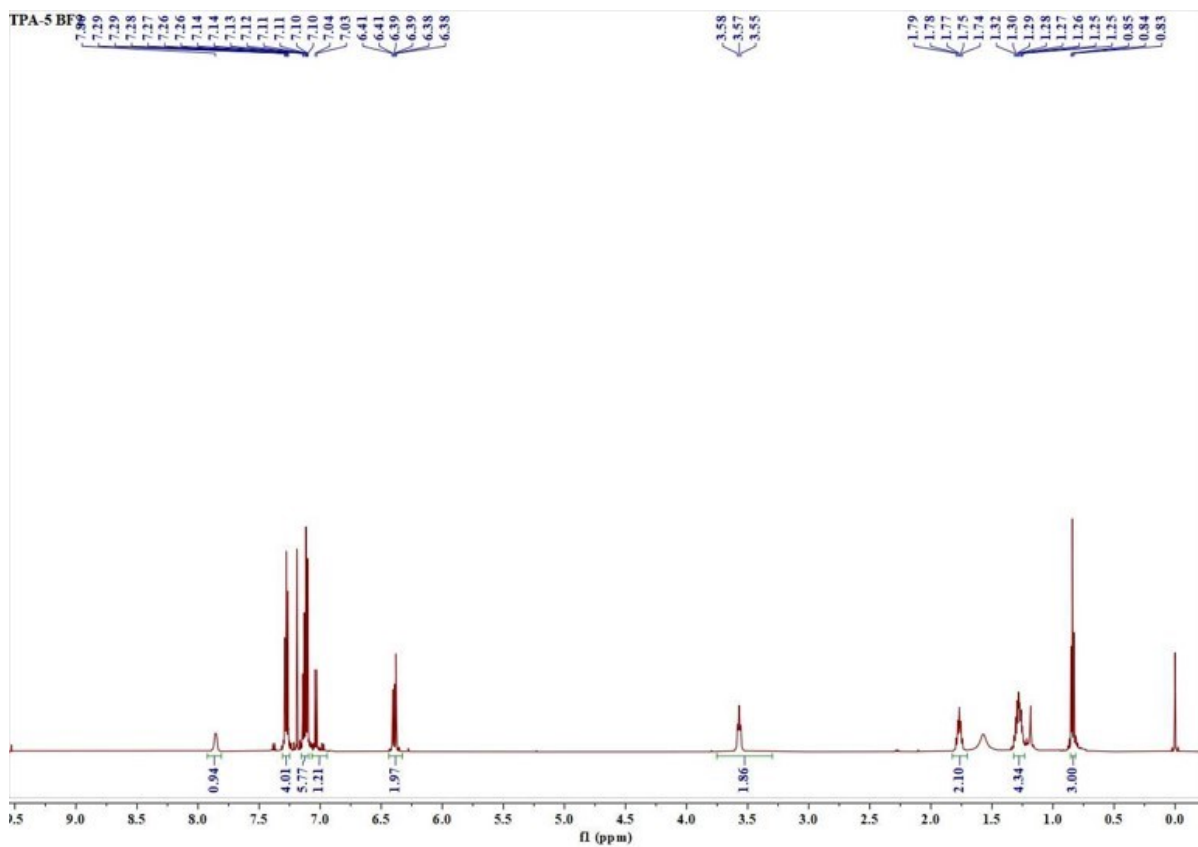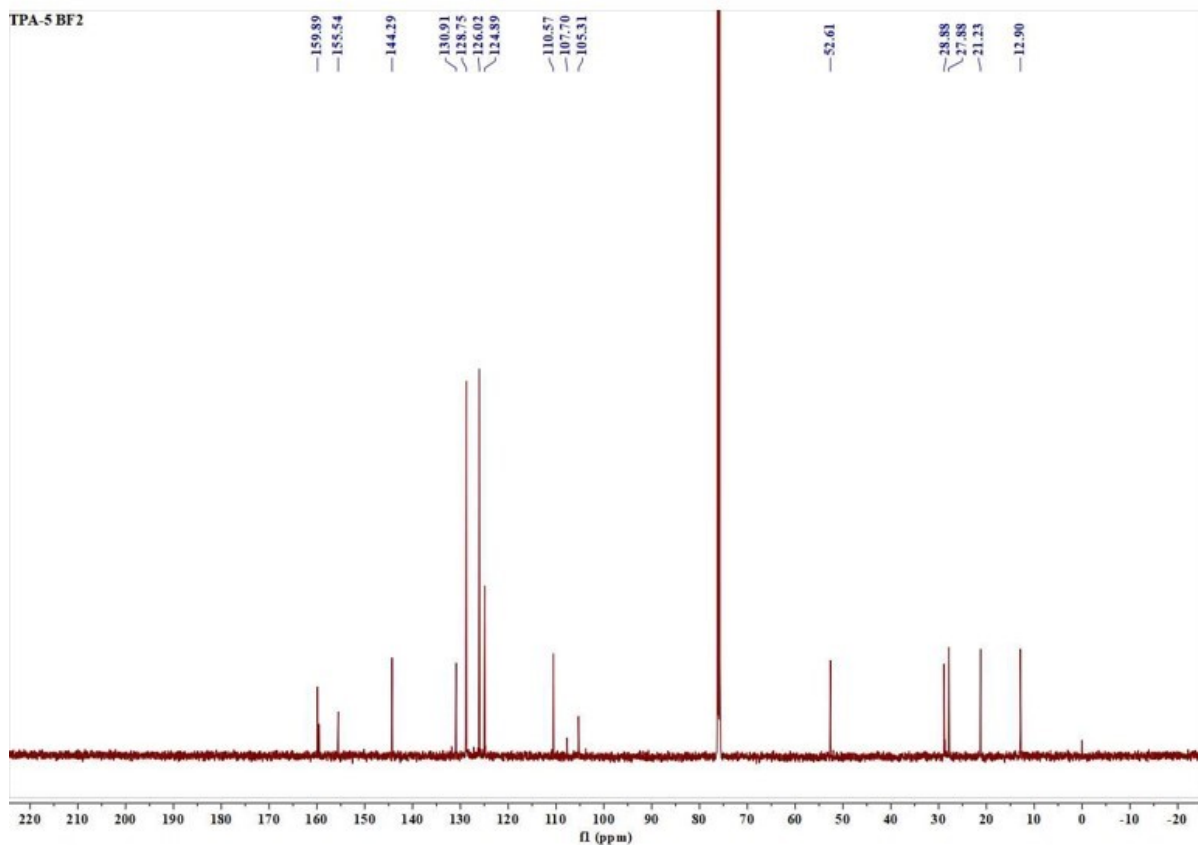

<sup>1</sup>H & <sup>13</sup>C NMR of TPA-BF<sub>2</sub>-5

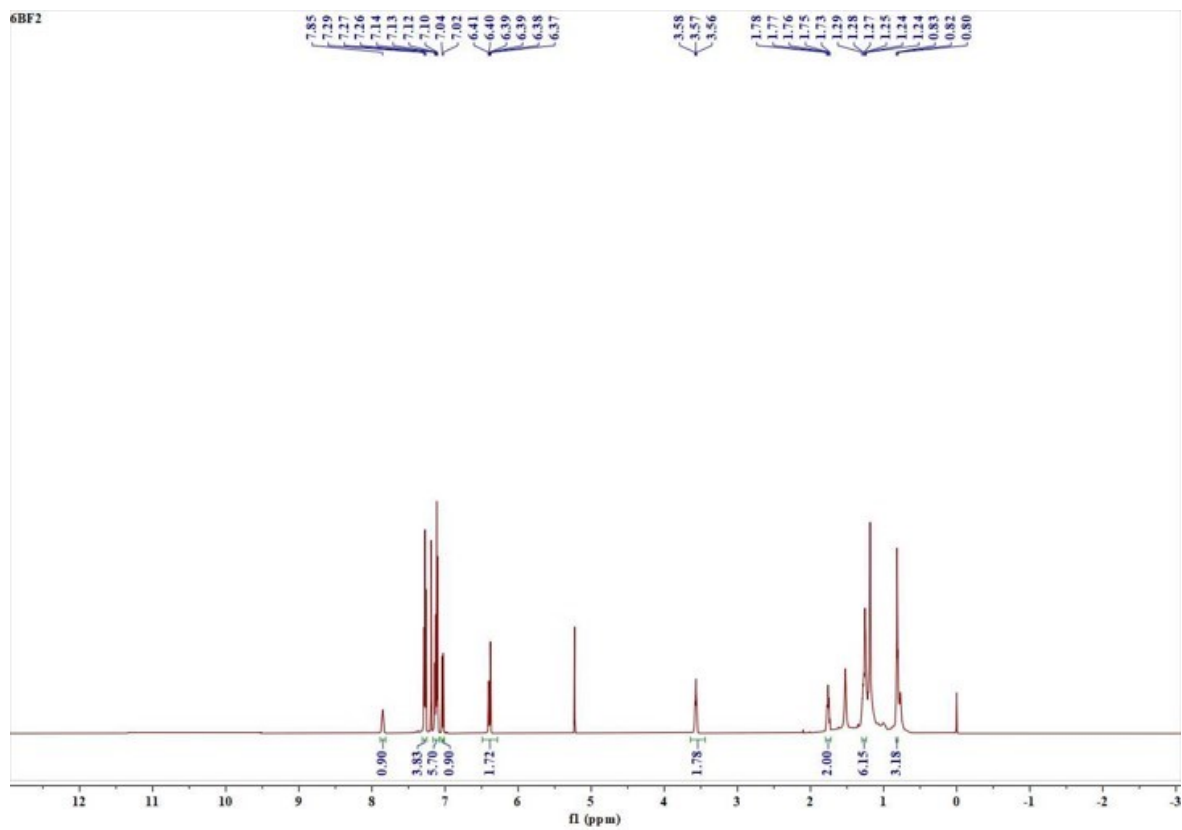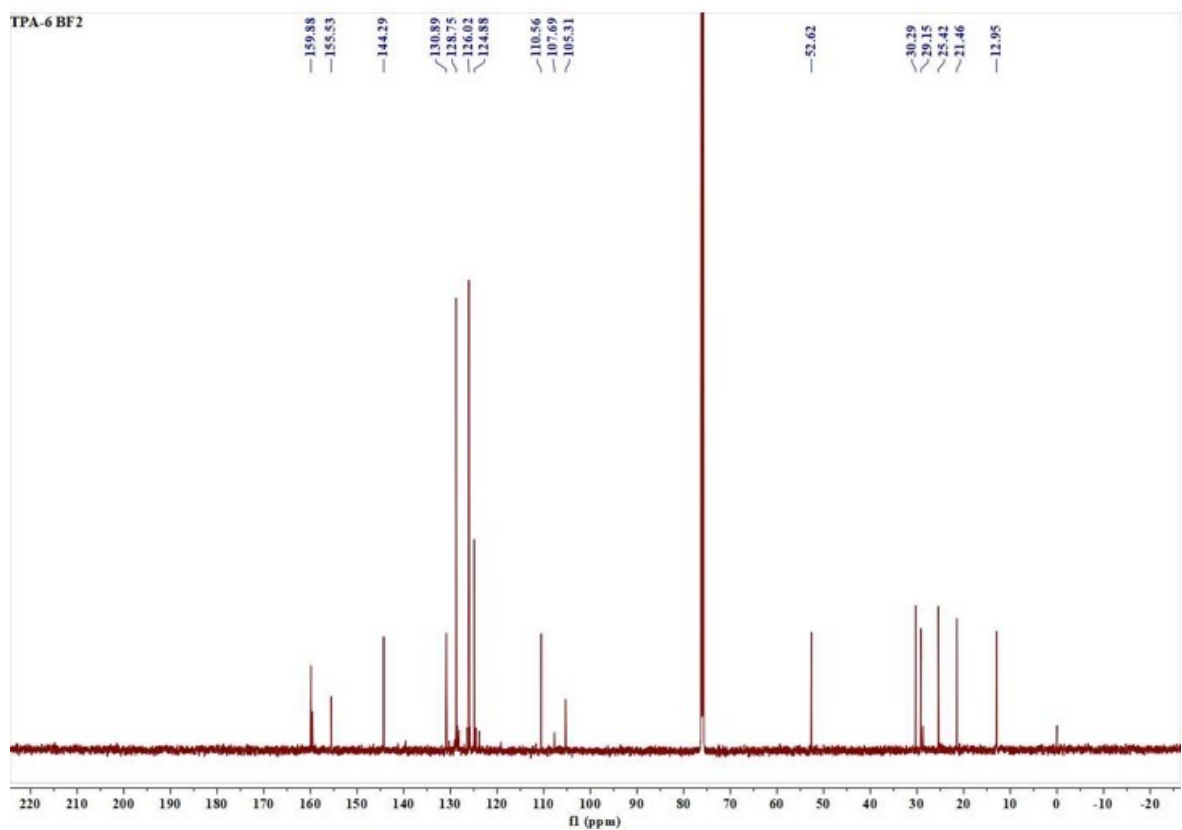

$^1\text{H}$  &  $^{13}\text{C}$  NMR of TPA- $\text{BF}_2$ -6

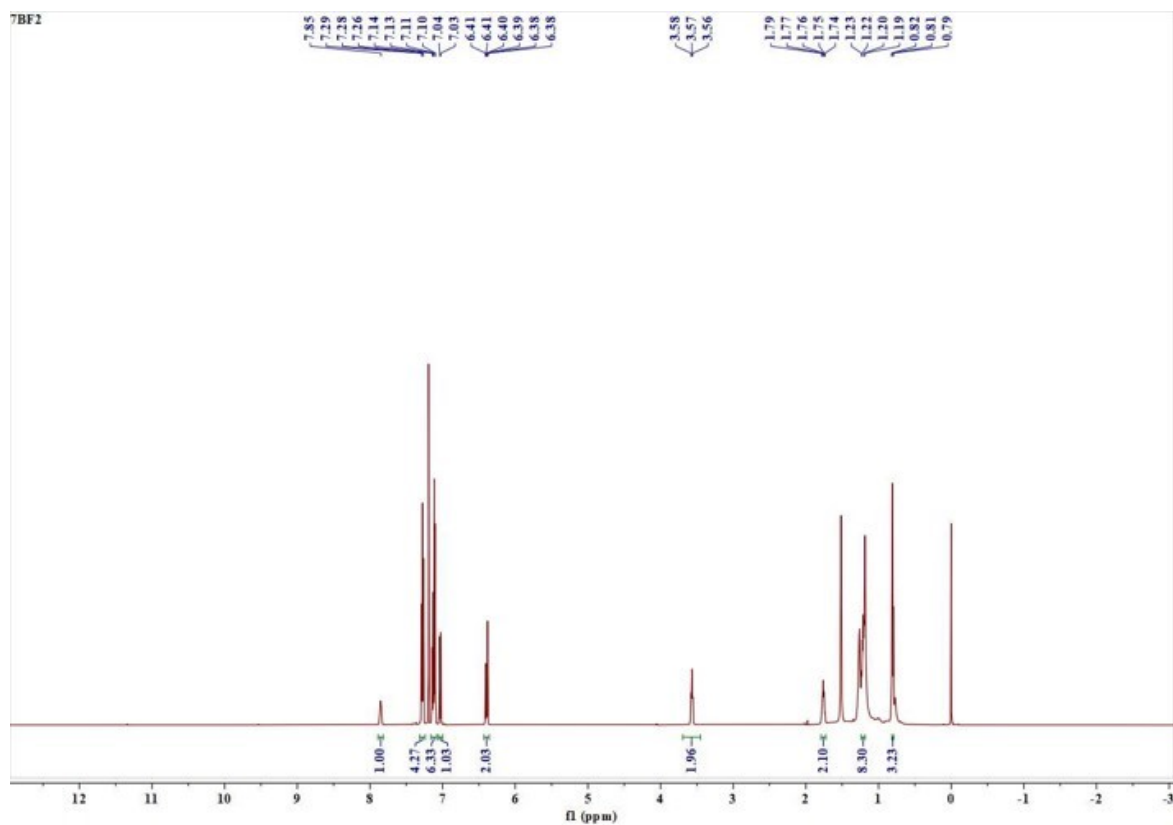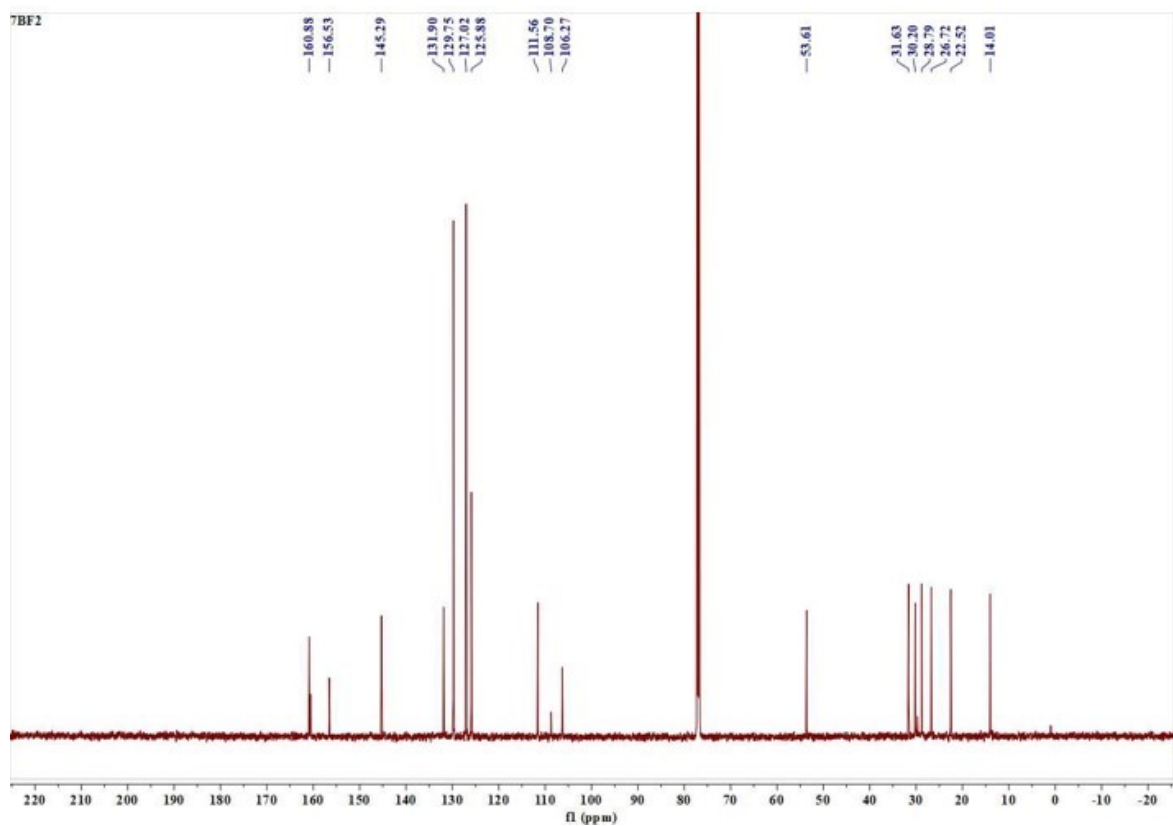

$^1\text{H}$  &  $^{13}\text{C}$  NMR of TPA- $\text{BF}_2$ -7

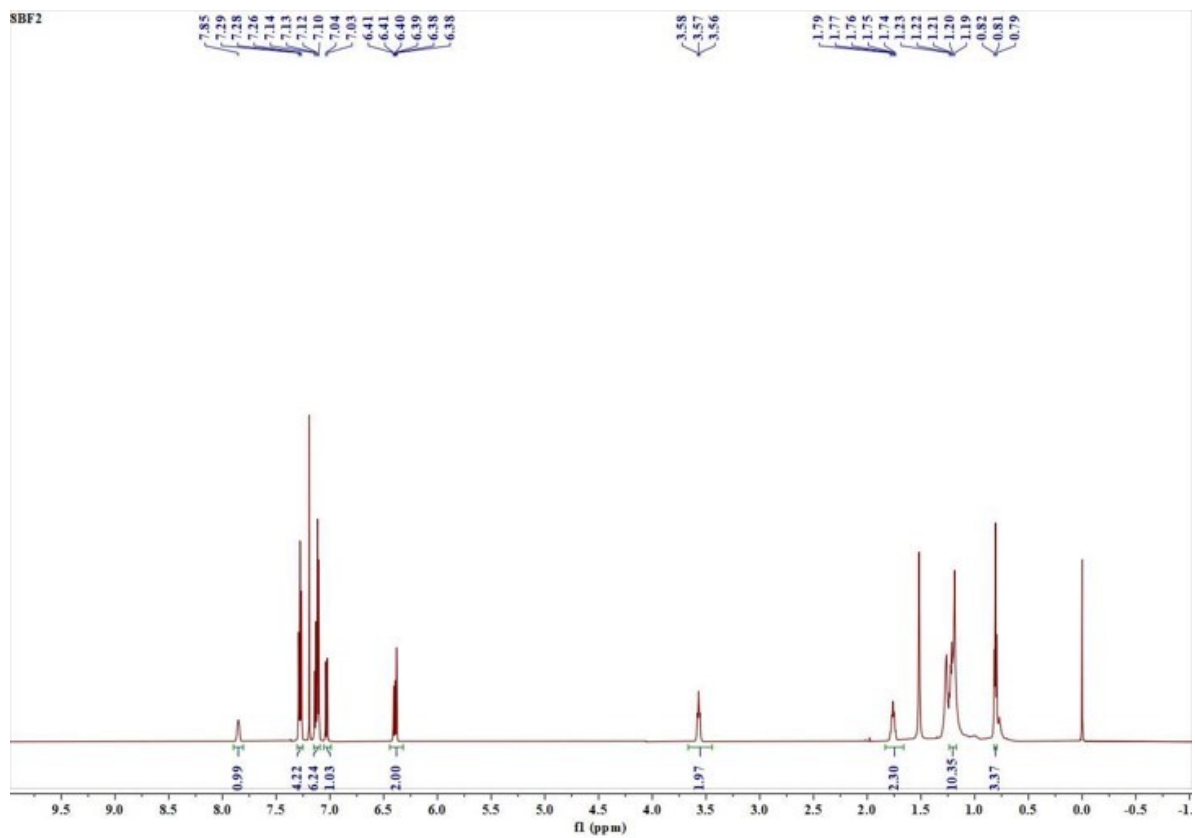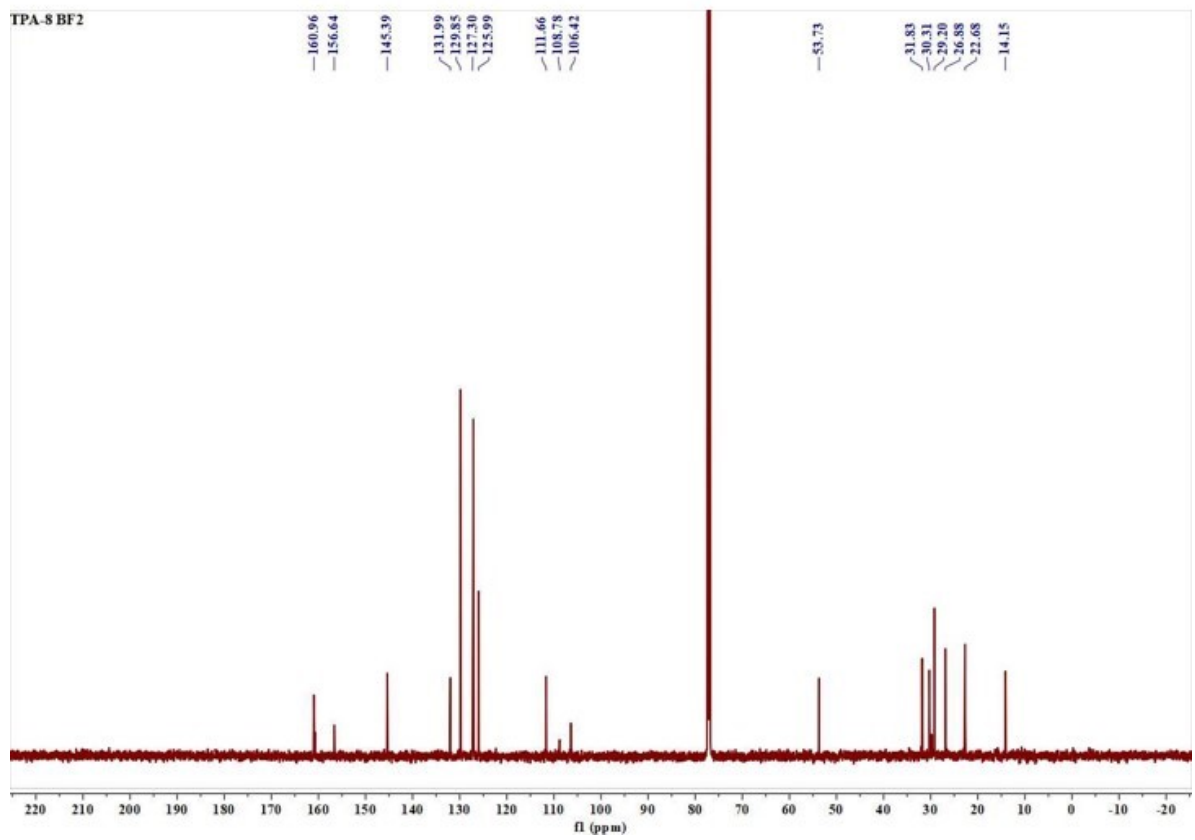

$^1\text{H}$  &  $^{13}\text{C}$  NMR of TPA- $\text{BF}_2$ -8



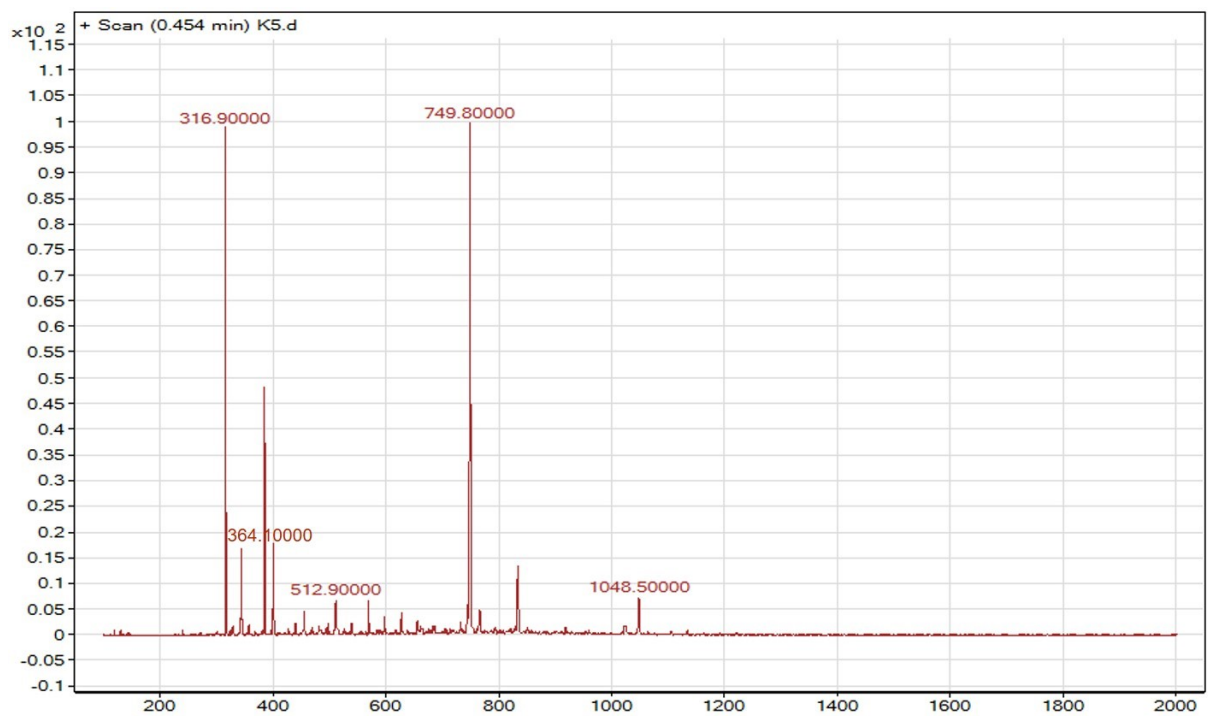

**TPA-BF<sub>2</sub>-2:** m/z calculated C<sub>21</sub>H<sub>19</sub>BF<sub>2</sub>N<sub>2</sub>O (M + H): 364.16, found: 364.10

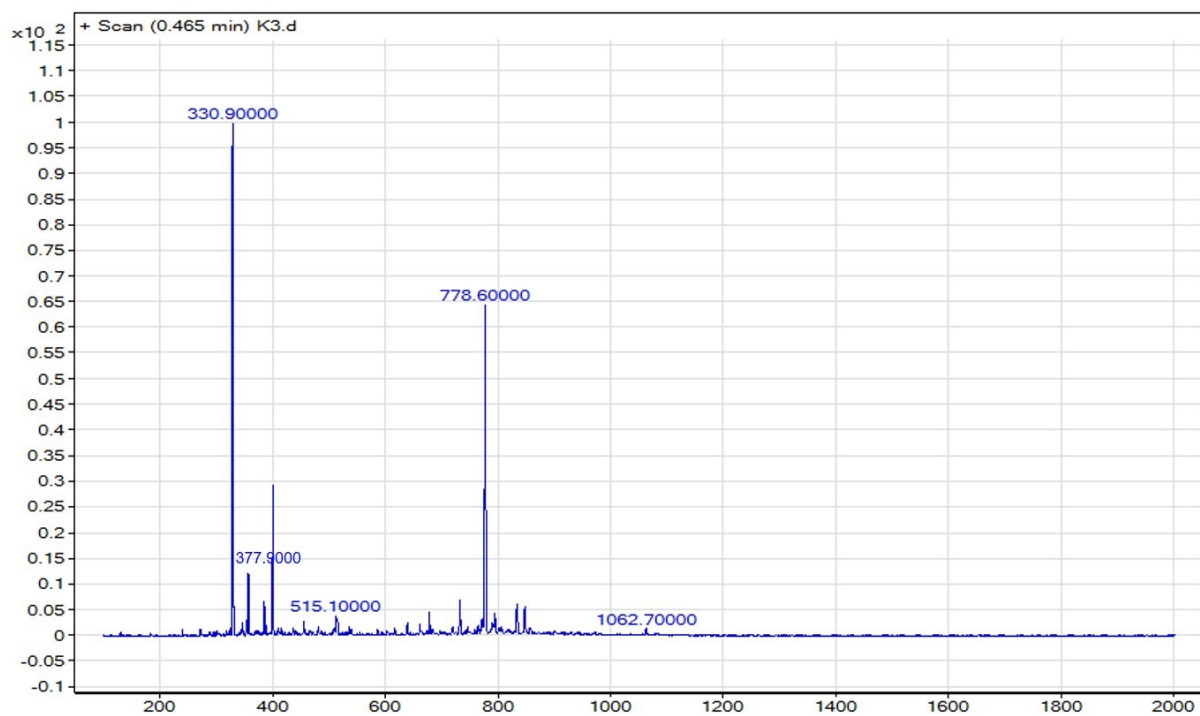

**TPA-BF<sub>2</sub>-3:** m/z calculated C<sub>22</sub>H<sub>21</sub>BF<sub>2</sub>N<sub>2</sub>O (M + H): 378.17, found: 377.90.

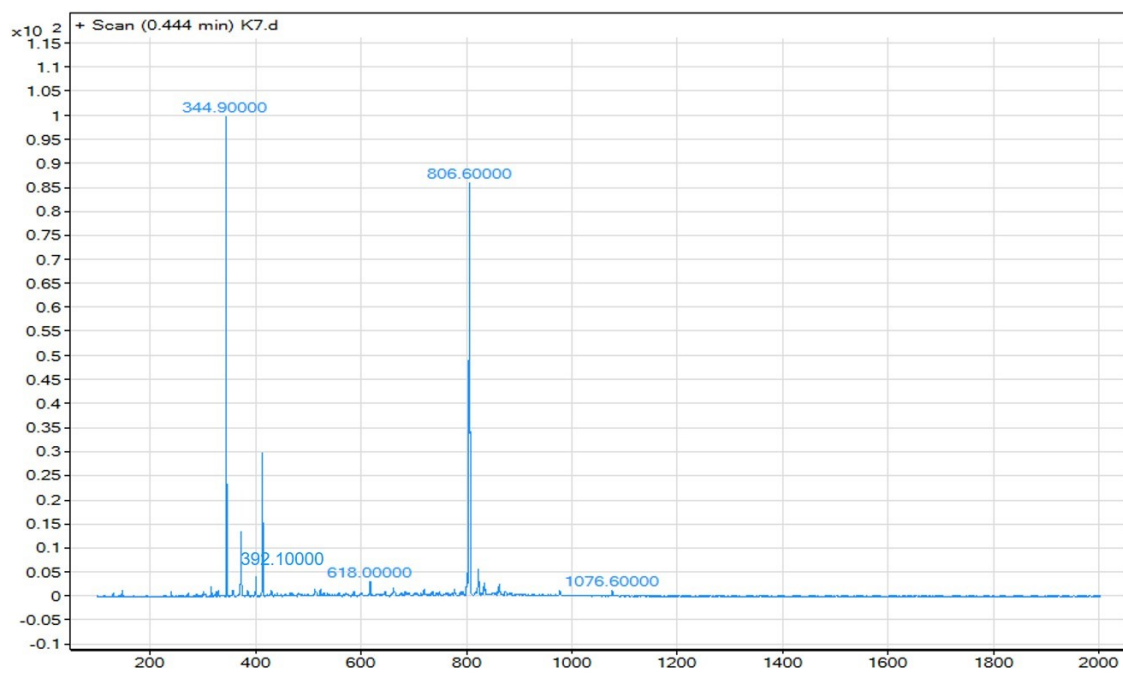

**TPA-BF<sub>2</sub>-4:** m/z calculated C<sub>23</sub>H<sub>23</sub>BF<sub>2</sub>N<sub>2</sub>O (M + H): 392.19, found: 392.10.

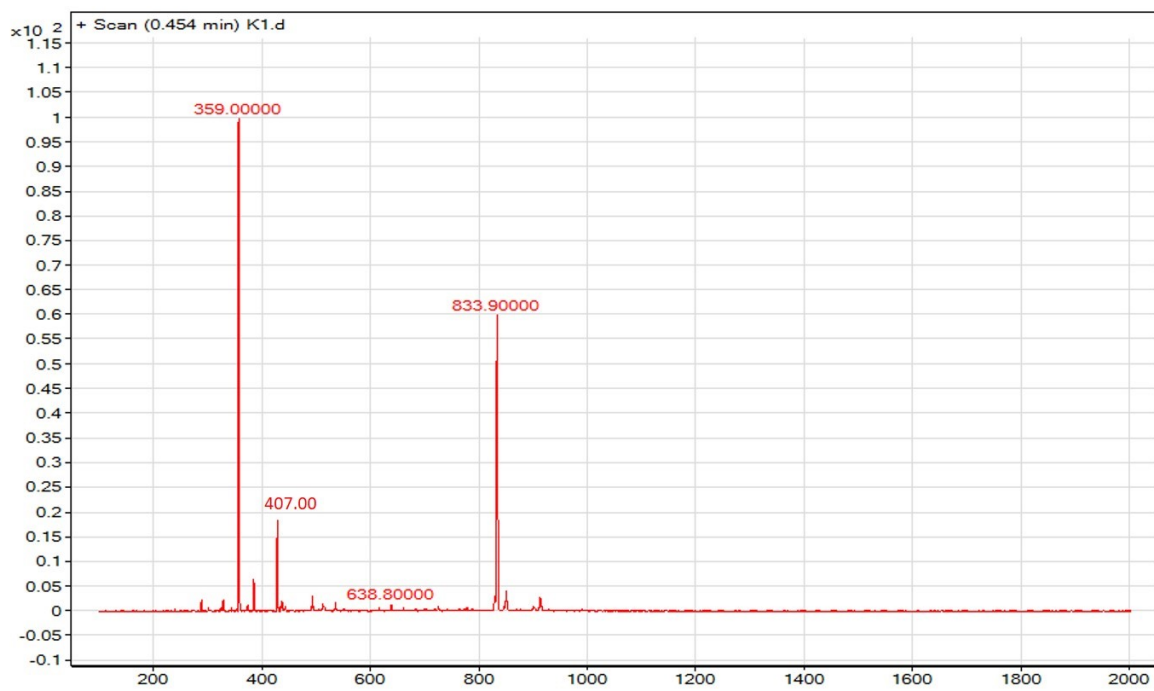

**TPA-BF<sub>2</sub>-5:** m/z calculated C<sub>24</sub>H<sub>25</sub>BF<sub>2</sub>N<sub>2</sub>O (M + H): 406.20, found: 407.00.

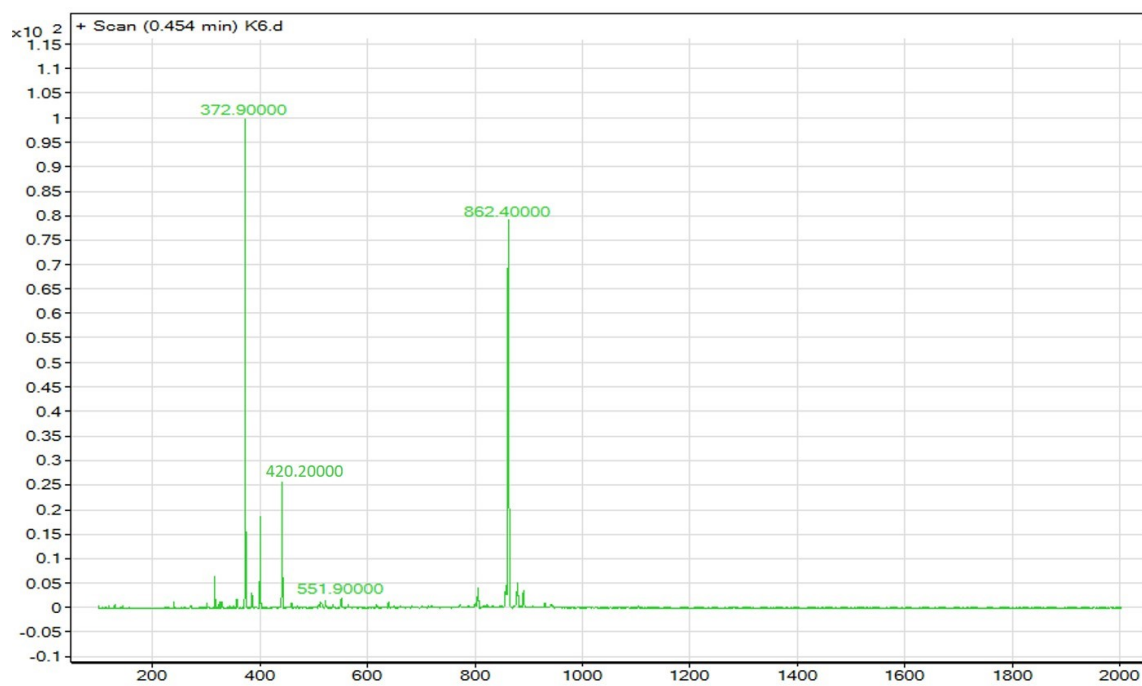

**TPA-BF<sub>2</sub>-6:** m/z calculated C<sub>25</sub>H<sub>27</sub>BF<sub>2</sub>N<sub>2</sub>O (M + H): 420.23, found: 420.20.

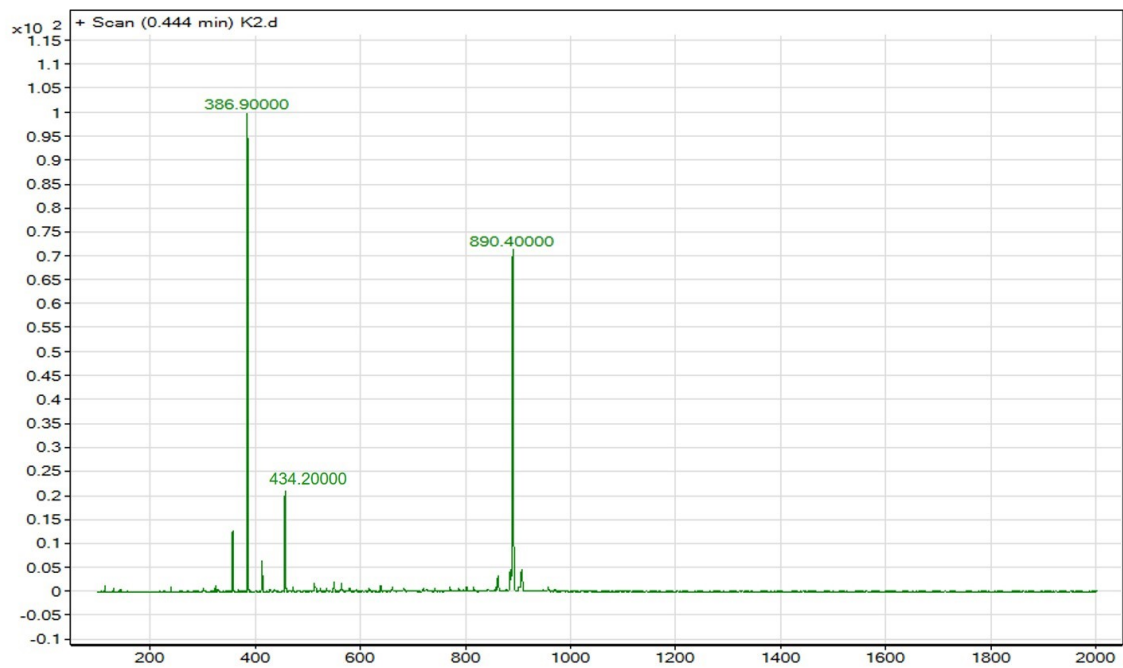

**TPA-BF<sub>2</sub>-7:** m/z calculated C<sub>26</sub>H<sub>29</sub>BF<sub>2</sub>N<sub>2</sub>O (M + H): 434.33, found: 434.20.

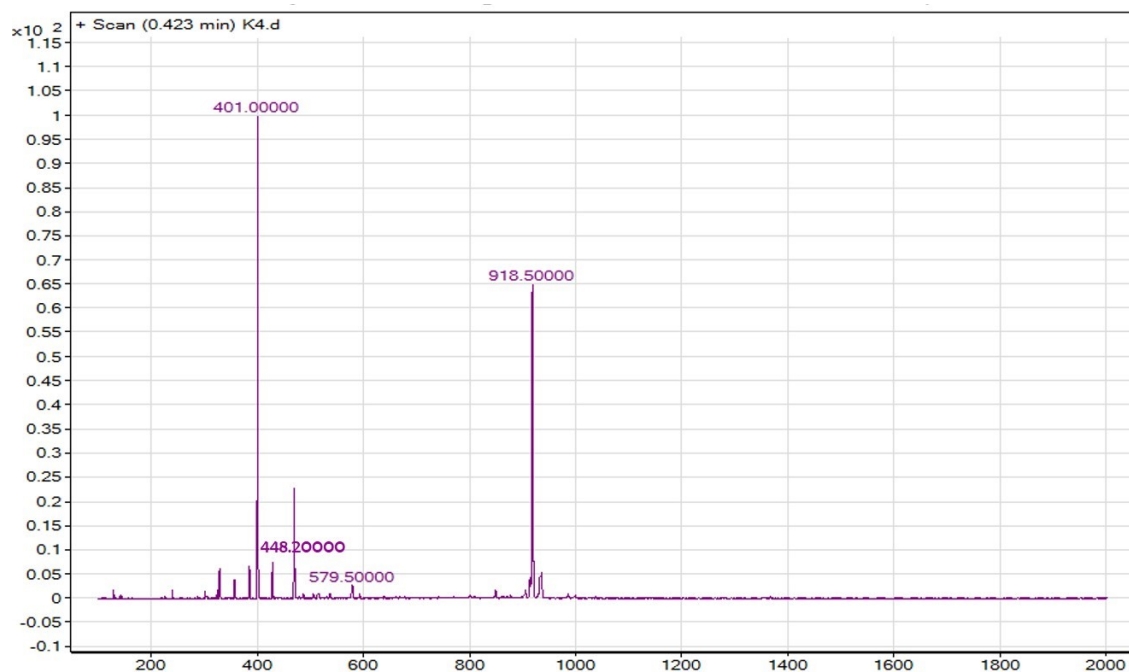

**TPA-BF<sub>2</sub>-8:** m/z calculated C<sub>27</sub>H<sub>31</sub>BF<sub>2</sub>N<sub>2</sub>O (M + H): 448.25, found: 448.20.

Table. Structure corresponding to the major two peaks of mass spectra.

| Structure | Found M.wt. |
|-----------|-------------|
|-----------|-------------|

|                                                                                                                        |                                                                                                                                                                                                                                                                                                                        |
|------------------------------------------------------------------------------------------------------------------------|------------------------------------------------------------------------------------------------------------------------------------------------------------------------------------------------------------------------------------------------------------------------------------------------------------------------|
| 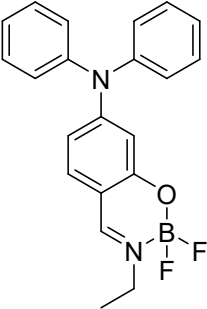 <p><b>TPA-BF<sub>2</sub>-2</b></p>   | <p>Fragment 1:<br/>peak value: 316.90<br/>M.wt: 316.40</p>  <p>Fragment 2:<br/>Peak value (M + Na):<br/>749.800<br/>Found (M+ Na): 749.38</p>      |
|  <p><b>TPA-BF<sub>2</sub>-3</b></p>  | <p>Fragment 1:<br/>peak value: 330.90<br/>M.wt: 330.43</p>  <p>Fragment 2:<br/>Peak value (M + Na): 778.60<br/>Found (M+ Na): 777.43</p>          |
|  <p><b>TPA-BF<sub>2</sub>-4</b></p> | <p>Fragment 1:<br/>peak value: 344.90<br/>M.wt: 344.46</p>  <p>Fragment 2:<br/>Peak value (M + Na):<br/>806.600<br/>Found (M+ Na): 805.49</p>  |
|                                     | <p>Fragment 1:<br/>Peak value: 359.00<br/>M.wt: 358.49</p>  <p>Fragment 2:<br/>Peak value (M + Na): 833.90<br/>Found (M+ Na): 833.54</p>       |

|                                                                                                                        |                                                                                                                                                                                                                                                                                                                    |
|------------------------------------------------------------------------------------------------------------------------|--------------------------------------------------------------------------------------------------------------------------------------------------------------------------------------------------------------------------------------------------------------------------------------------------------------------|
| <p><b>TPA-BF<sub>2</sub>-5</b></p>                                                                                     |                                                                                                                                                                                                                                                                                                                    |
| 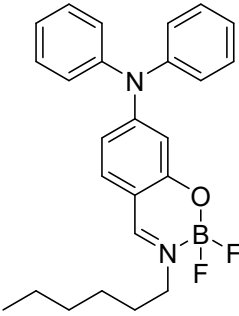 <p><b>TPA-BF<sub>2</sub>-6</b></p>   | <p>Fragment 1:<br/>Peak value: 372.900<br/>M.wt: 372.51</p>  <p>Fragment 2:<br/>Peak value (M + Na): 862.40<br/>Found (M+ Na): 861.6</p>       |
|  <p><b>TPA-BF<sub>2</sub>-7</b></p> | <p>Fragment 1:<br/>Peak value: 386.90<br/>M.wt: 386.54</p>  <p>Fragment 2:<br/>Peak value (M + Na): 890.40<br/>Found (M+ Na): 889.65</p>  |

|                             | Quantum yield (%) |
|-----------------------------|-------------------|
| <b>TPA-BF<sub>2</sub>-2</b> | 1.9               |
| <b>TPA-BF<sub>2</sub>-3</b> | 2.2               |
| <b>TPA-BF<sub>2</sub>-4</b> | 4.1               |

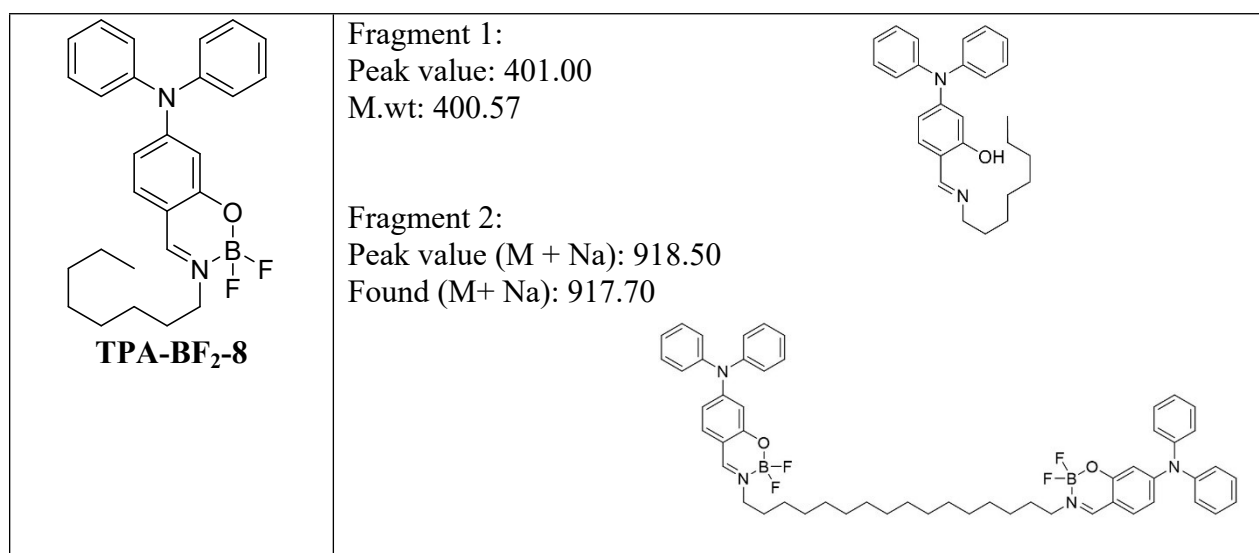

Table S1. Fluorescence efficiency of **TPA-BF<sub>2</sub>** complexes.



|                             |      |
|-----------------------------|------|
| <b>TPA-BF<sub>2</sub>-5</b> | 7.5  |
| <b>TPA-BF<sub>2</sub>-6</b> | 7.8  |
| <b>TPA-BF<sub>2</sub>-7</b> | 12.6 |
| <b>TPA-BF<sub>2</sub>-8</b> | 8.2  |

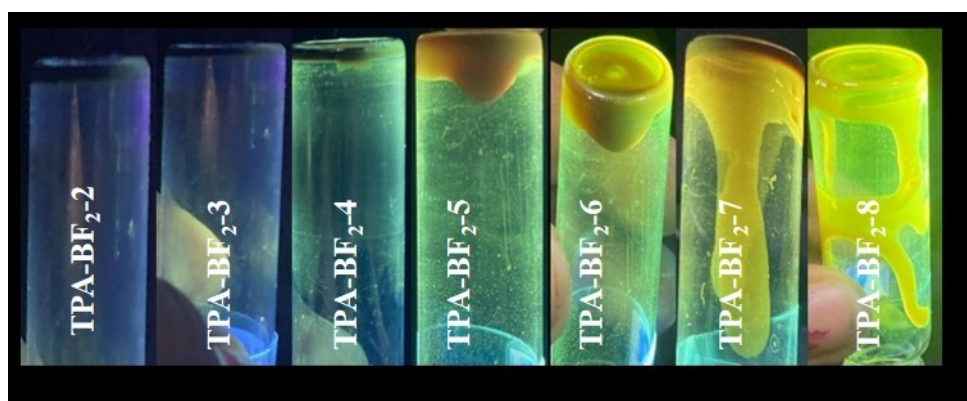

Figure S1. Digital fluorescence images of **TPA-BF<sub>2</sub>** complexes.  $\lambda_{\text{exc}} = 365$  nm.

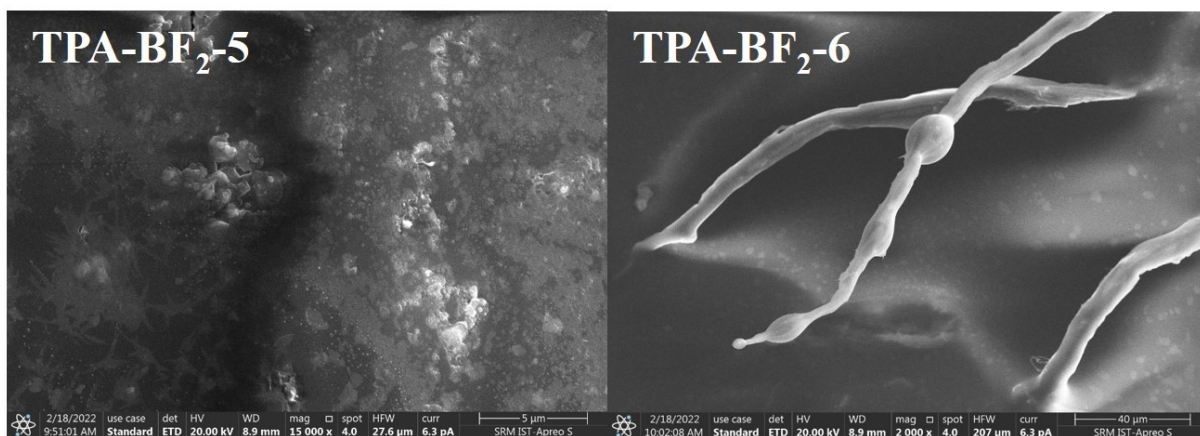

Figure S2. FE-SEM images of TPA-BF<sub>2</sub>-5 and TPA-BF<sub>2</sub>-6 complexes.

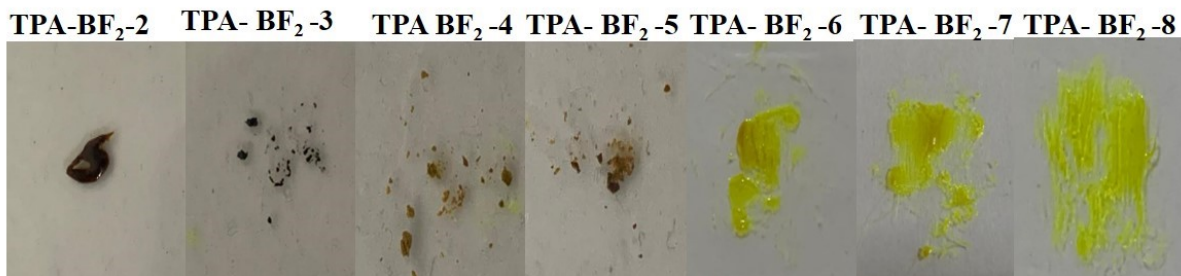

Figure S3. Digital images of TPA-BF<sub>2</sub> complexes.

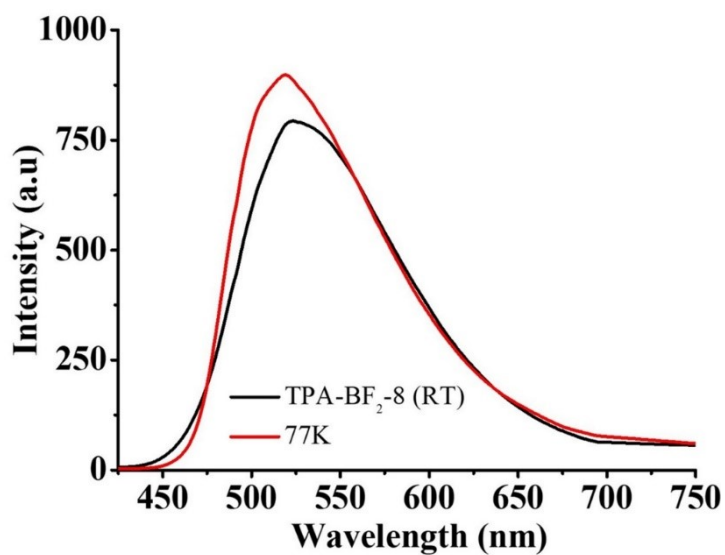

Figure S4. Fluorescence spectra of TPA-BF<sub>2</sub>-8 at RT and 77K.

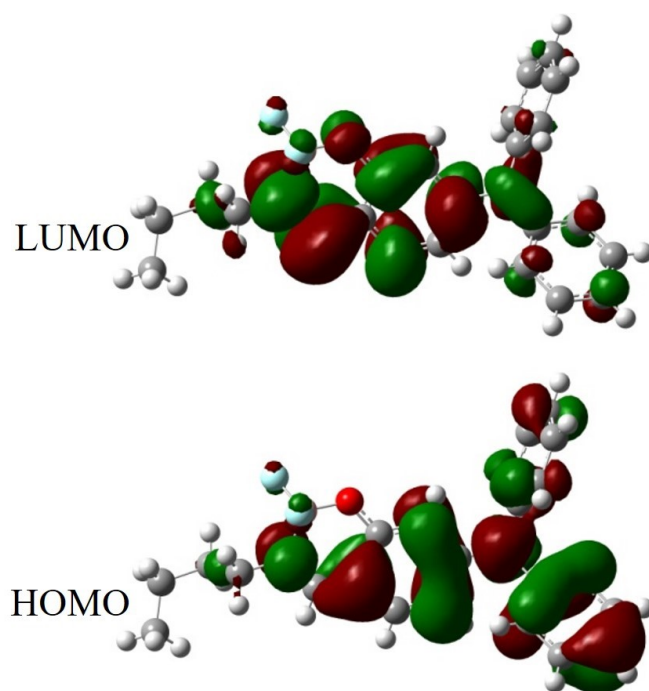

Figure S5. HOMO-LUMO molecular orbital diagram of TPA-BF<sub>2</sub>-4.

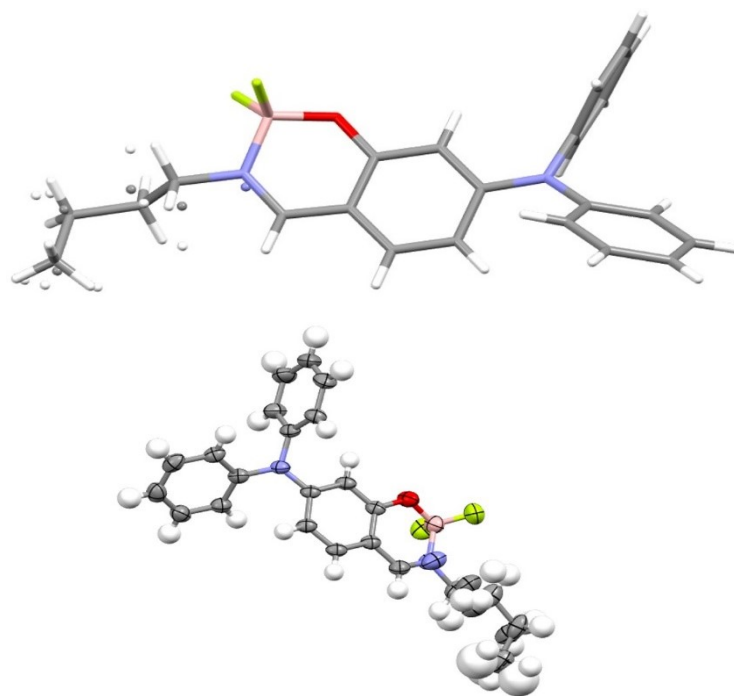

Figure  
S6.

Disordered molecular structure and ORTEP (50% probability) structure of TPA-BF<sub>2</sub>-4.

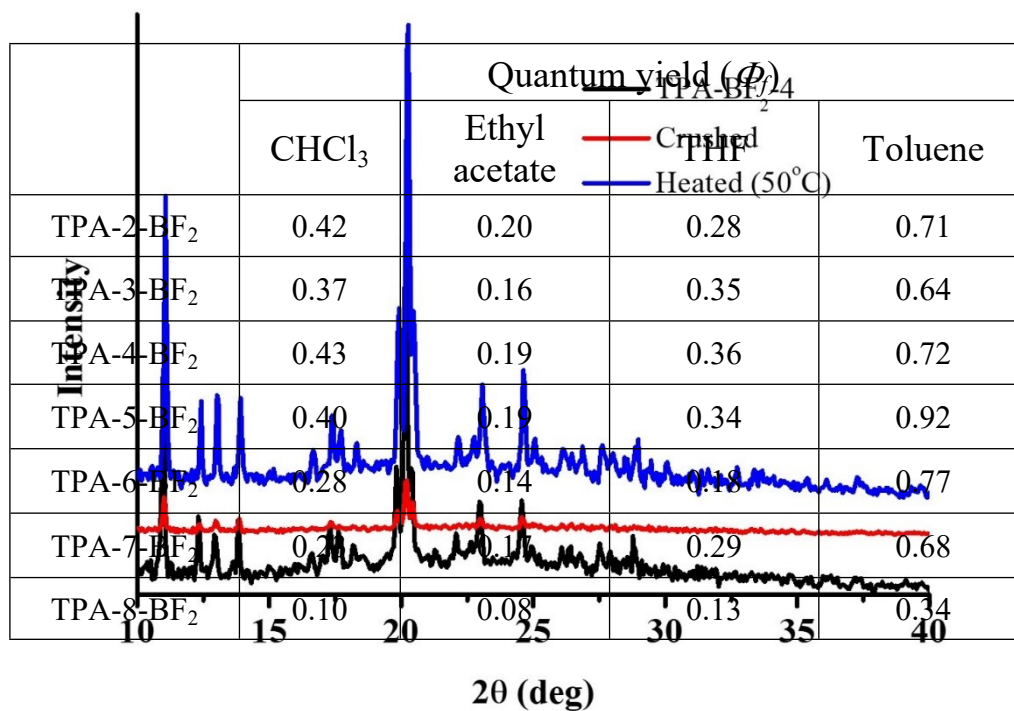

Figure S7. PXRD of TPA-BF<sub>2</sub>-4.

Table S2. Quantum yield of TPA-BF<sub>2</sub> complexes in different solvent compared to quinine sulphate standard.

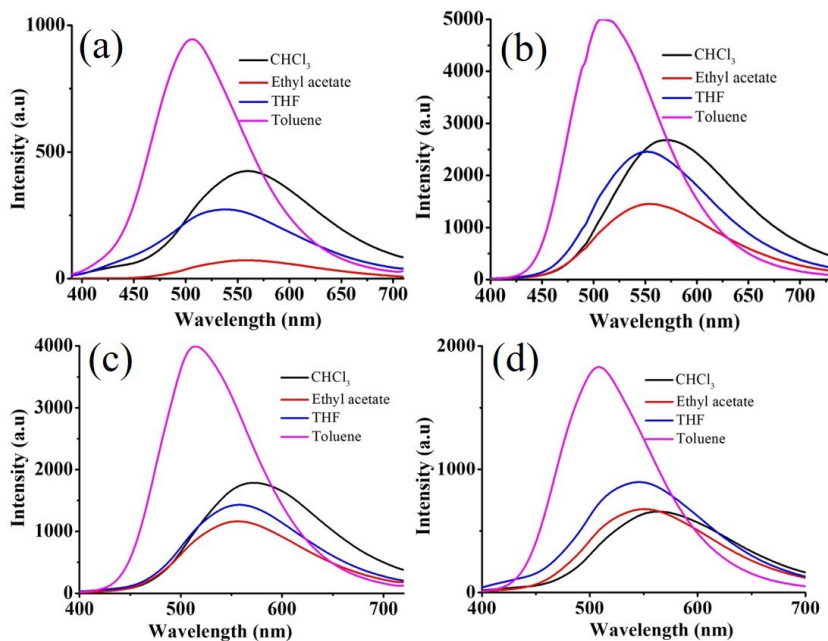

Figure S8. Fluorescence spectra of (a) TPA-BF<sub>2</sub>-3, (b) TPA-BF<sub>2</sub>-4, (c) TPA-BF<sub>2</sub>-6 and (d) TPA-BF<sub>2</sub>-8 in different solvent polarity.

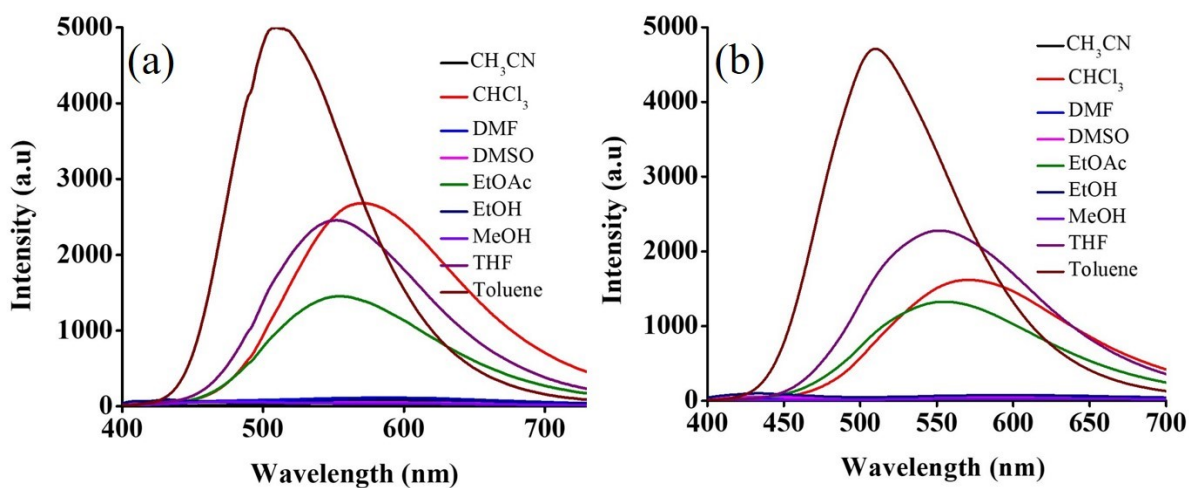

Figure S9. Fluorescence spectra of (a) TPA-BF<sub>2</sub>-4 and (b) TPA-BF<sub>2</sub>-7 in different solvent polarity.

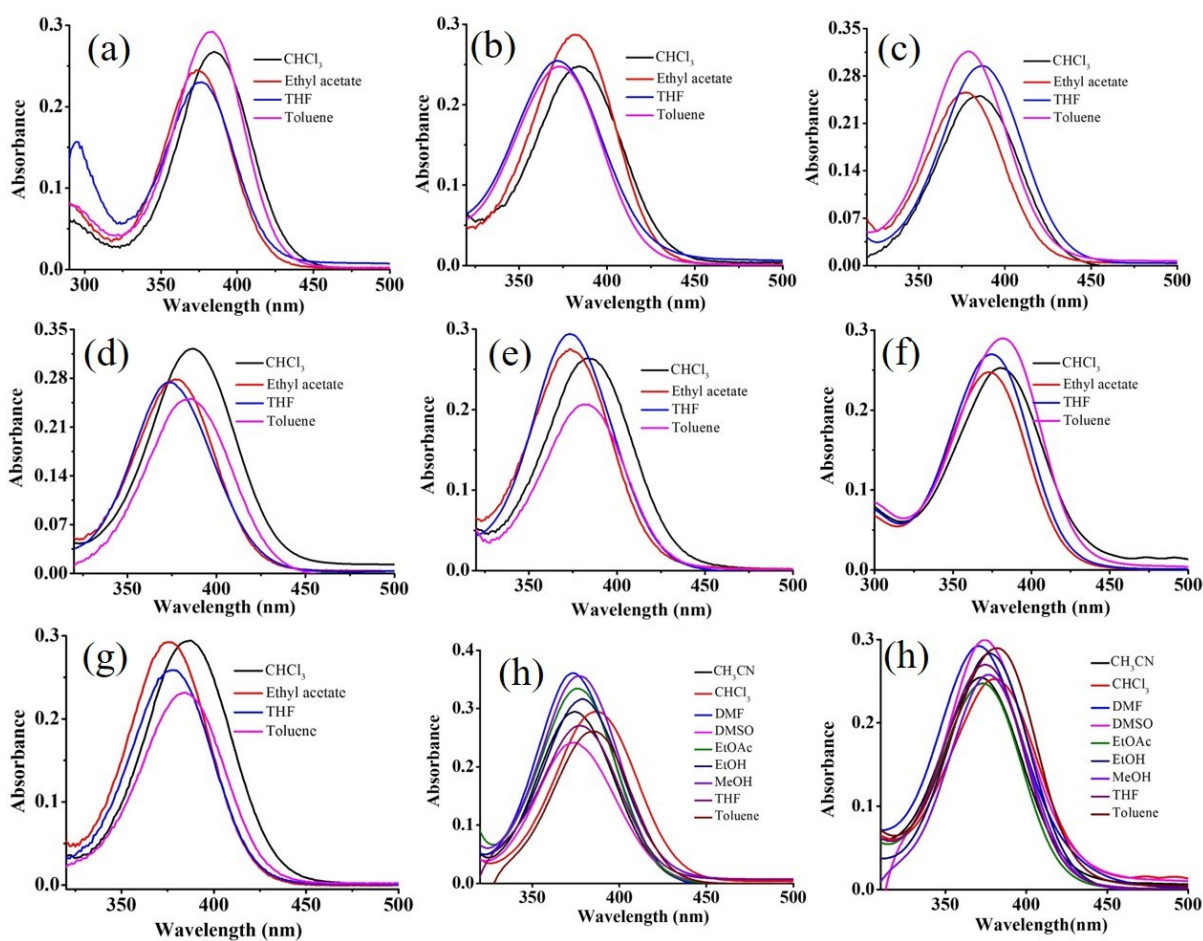

Figure S10. Absorption spectra of (a) TPA-BF<sub>2</sub>-2, (b) TPA-BF<sub>2</sub>-3, (c, h) TPA-BF<sub>2</sub>-4, (d) TPA-BF<sub>2</sub>-5, (e) TPA-BF<sub>2</sub>-6, (f, h) TPA-BF<sub>2</sub>-7 and (g) TPA-BF<sub>2</sub>-8 in different solvent polarity.



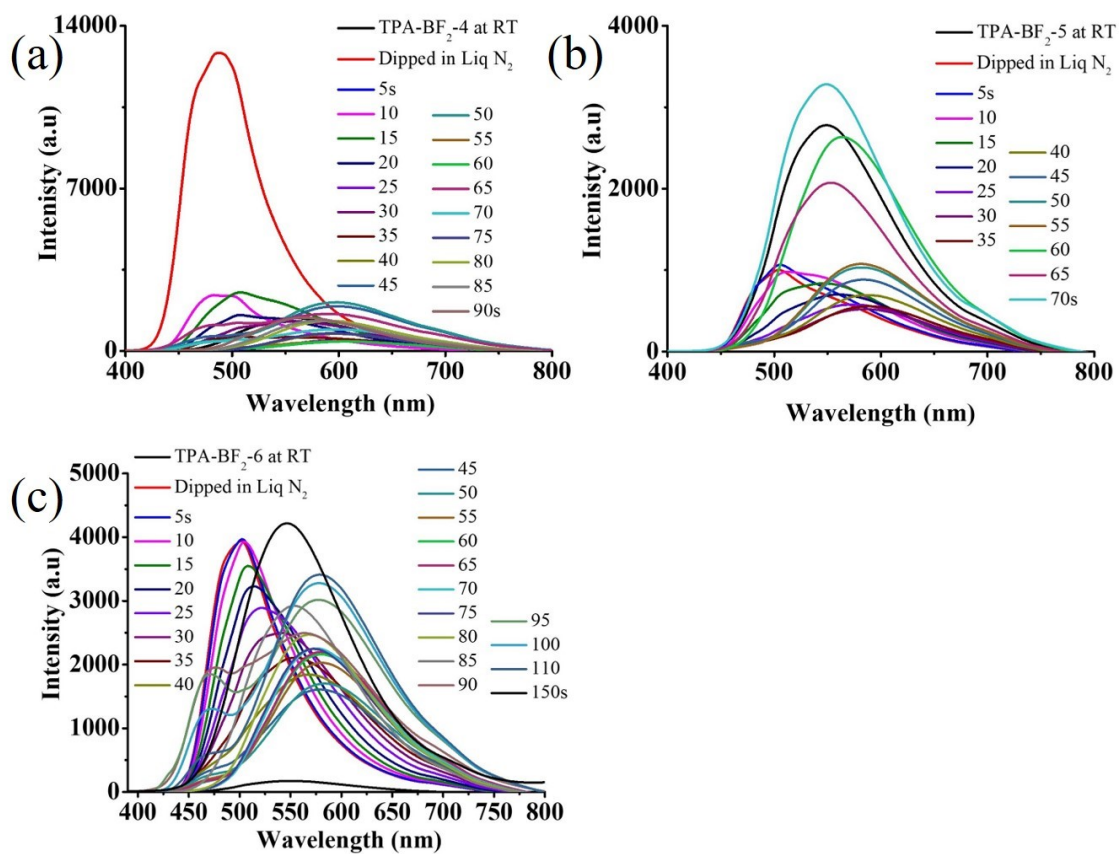

Figure S11. Fluorescence tuning of (a) TPA-BF<sub>2</sub>-4, (b) TPA-BF<sub>2</sub>-5 and (c) TPA-BF<sub>2</sub>-6 complexes in CHCl<sub>3</sub> while warming from 77K to RT.  $\lambda_{exc} = 370$  nm.



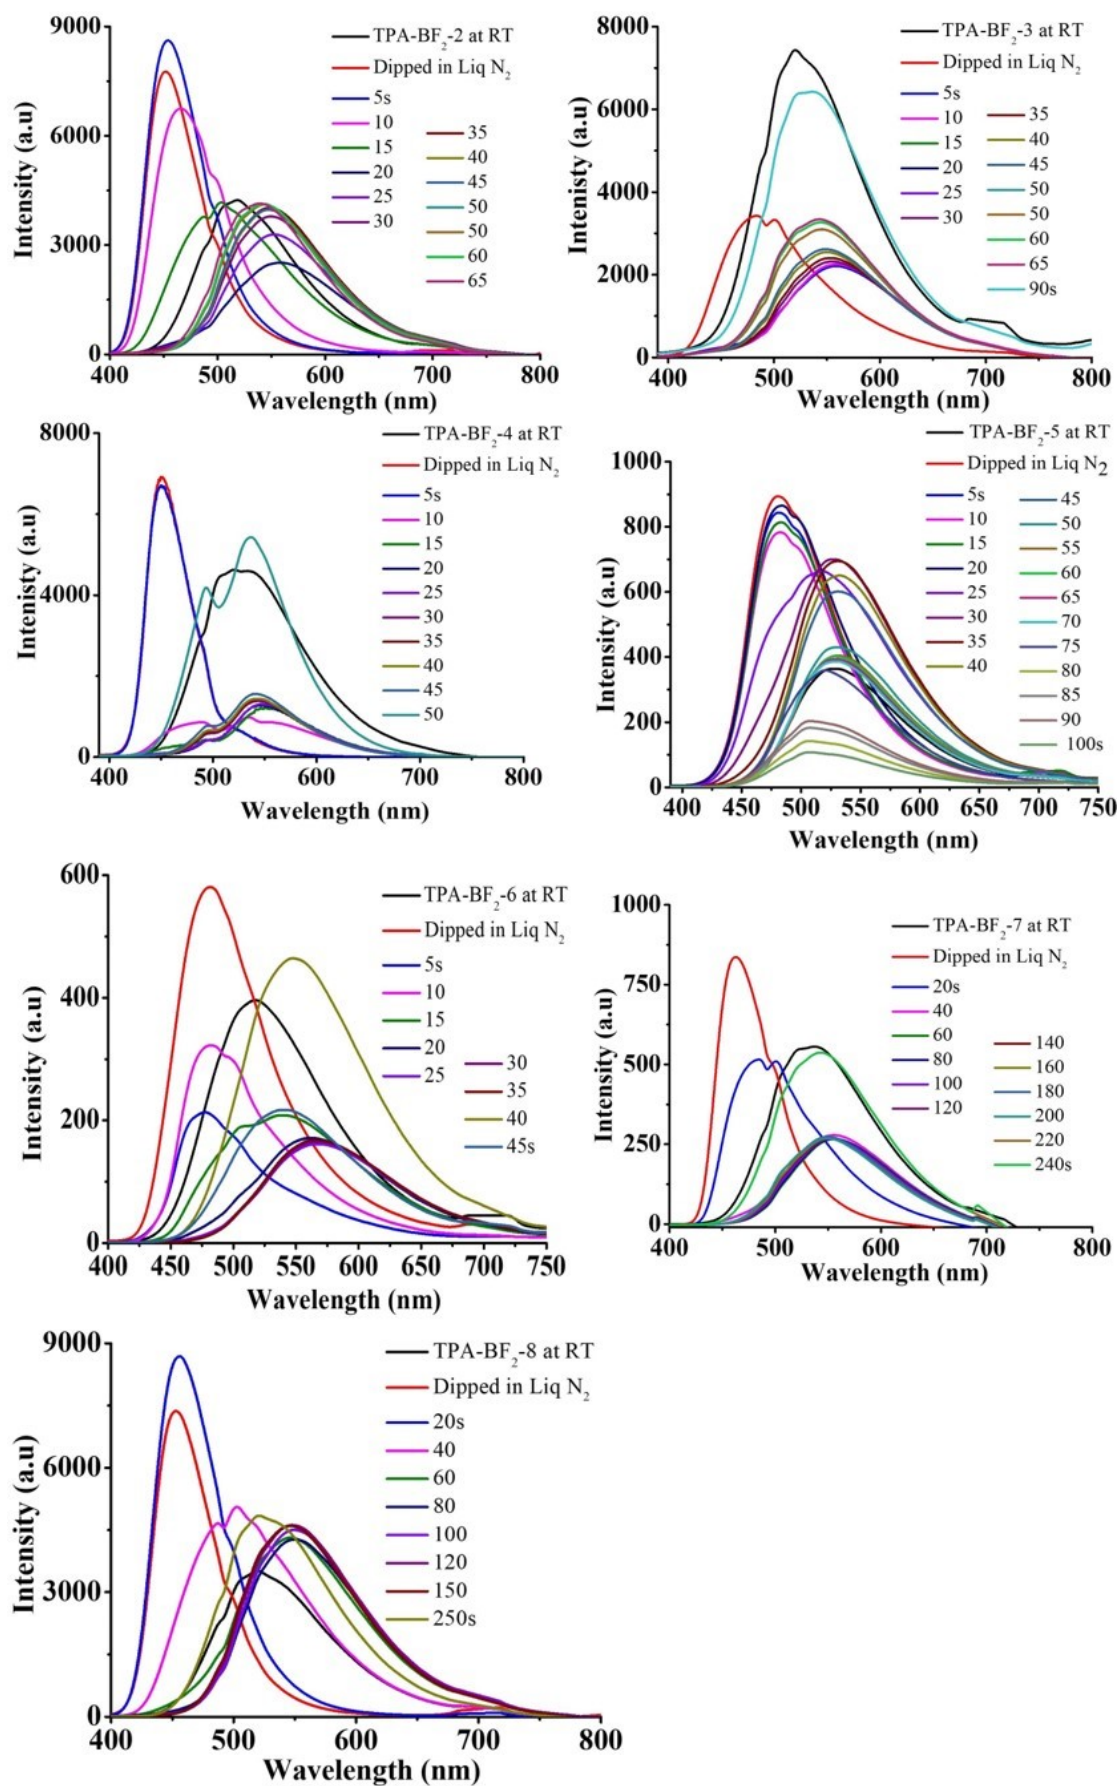

Figure S12. Fluorescence tuning of TPA-BF<sub>2</sub> complexes in toluene while warming from 77K to RT.  $\lambda_{exc} = 370$  nm.

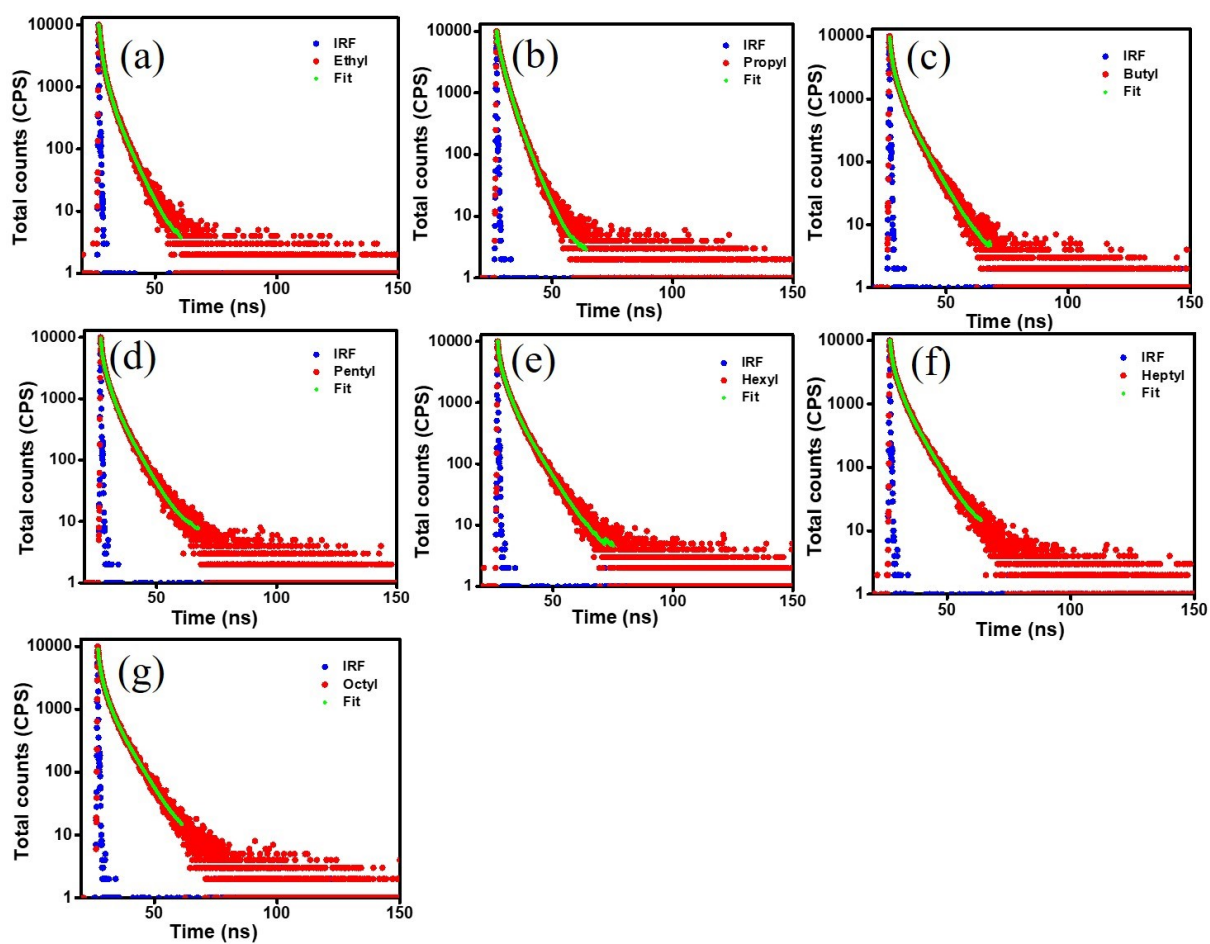

Figure S13. Fluorescence lifetime decay (a) **TPA-BF<sub>2</sub>-2**, (b) **TPA-BF<sub>2</sub>-3**, (c) **TPA-BF<sub>2</sub>-4**, (d) **TPA-BF<sub>2</sub>-5**, (e) **TPA-BF<sub>2</sub>-6**, (f) **TPA-BF<sub>2</sub>-7** and (g) **TPA-BF<sub>2</sub>-8** complexes in CHCl<sub>3</sub> at RT.

**Table S3.** Shows the  $\chi^2$  value and fluorescence life time decay of ethyl, propyl, butyl, pentyl, hexyl, octyl respectively in solution state,  $B_1$ ,  $B_2$ ,  $B_3$  are relative individual component contributions to  $\tau_1$ ,  $\tau_2$ ,  $\tau_3$ .  $\langle \tau \rangle$  (ns) is the average lifetime from multiple decay profiles.

|                       | $B_1$ | $B_2$ | $B_3$ | $\tau_1$ | $\tau_2$ | $\tau_3$ | $\langle \tau \rangle$<br>(ns) | $\chi^2$ |
|-----------------------|-------|-------|-------|----------|----------|----------|--------------------------------|----------|
| TPA-2-BF <sub>2</sub> | 0.26  | 0.09  | 0.65  | 1.935    | 5.079    | 0.554    | 2.64                           | 1.10     |
| TPA-3-BF <sub>2</sub> | 0.38  | 0.14  | 0.49  | 2.264    | 4.654    | 0.354    | 2.99                           | 1.09     |
| TPA-4-BF <sub>2</sub> | 0.27  | 0.10  | 0.63  | 2.06     | 6.248    | 0.397    | 3.60                           | 1.17     |
| TPA-5-BF <sub>2</sub> | 0.25  | 0.10  | 0.65  | 2.104    | 6.043    | 0.293    | 3.64                           | 1.31     |
| TPA-6-BF <sub>2</sub> | 0.28  | 0.11  | 0.61  | 2.419    | 6.816    | 0.316    | 4.20                           | 1.07     |
| TPA-7-BF <sub>2</sub> | 0.26  | 0.15  | 0.59  | 2.061    | 6.331    | 0.319    | 4.29                           | 1.12     |
| TPA-8-BF <sub>2</sub> | 0.28  | 0.13  | 0.60  | 1.946    | 6.396    | 0.338    | 4.08                           | 1.03     |

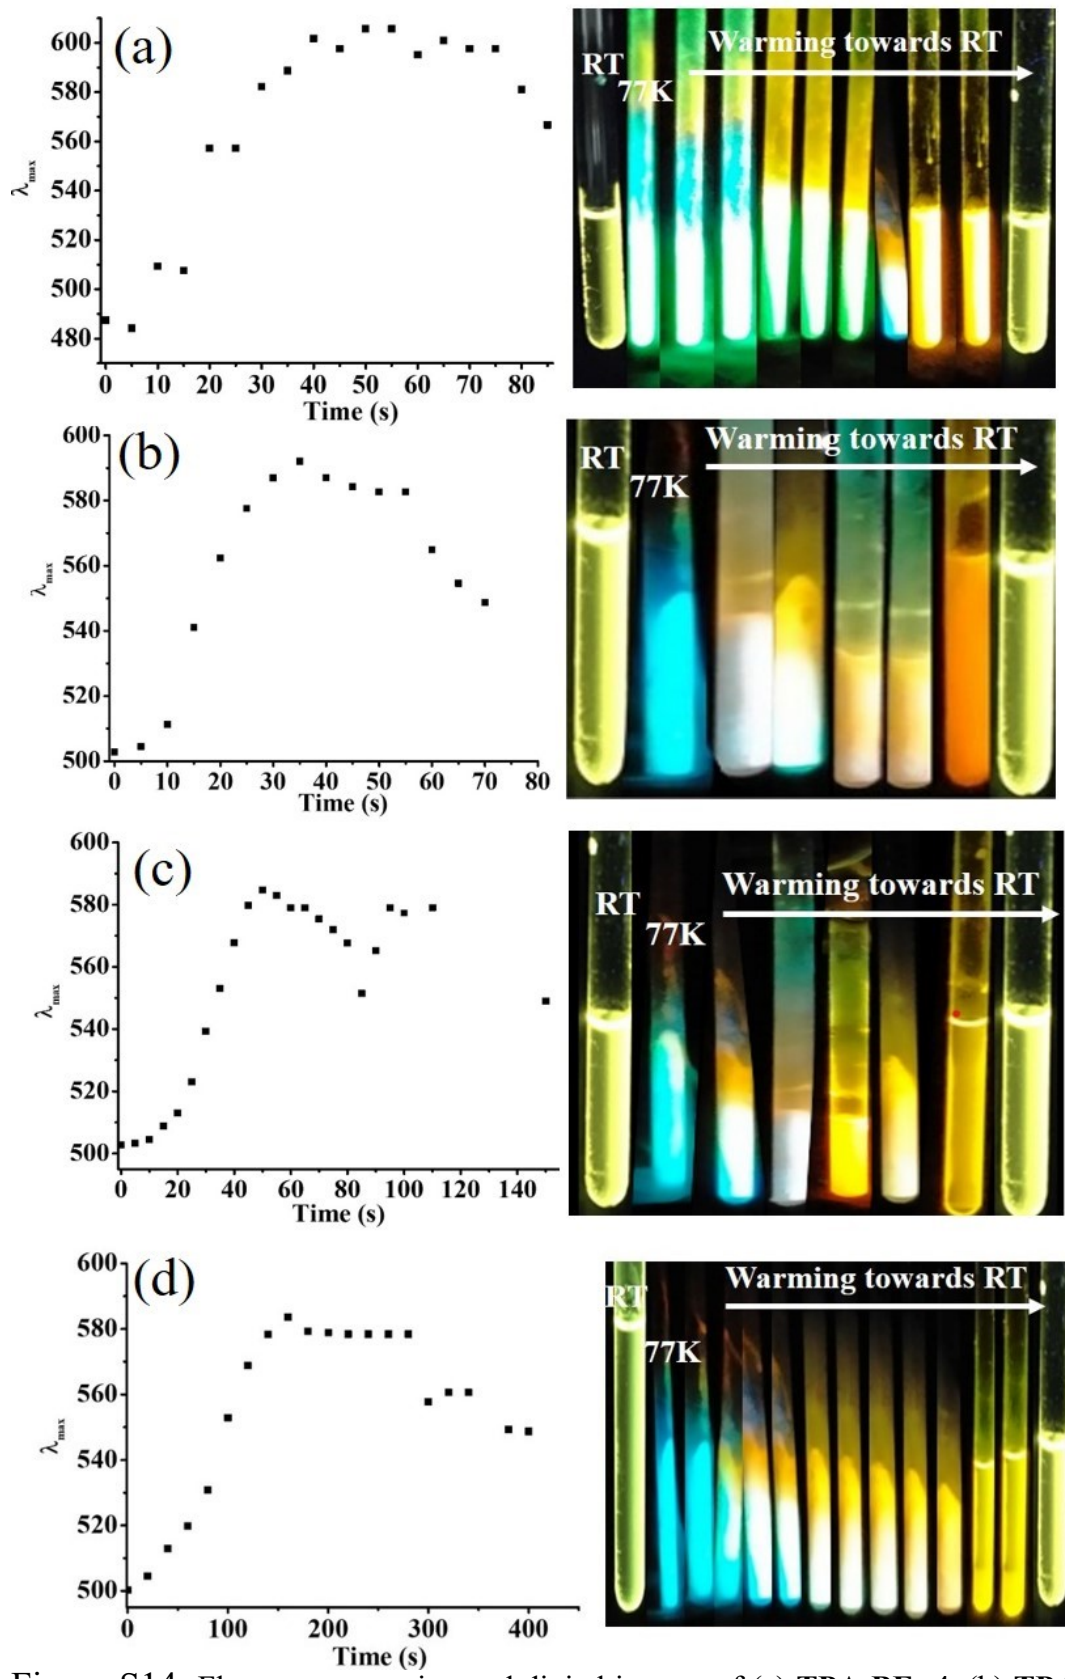

Figure S14. Fluorescence tuning and digital images of (a) TPA-BF<sub>2</sub>-4, (b) TPA-BF<sub>2</sub>-5 and (c) TPA-BF<sub>2</sub>-6 in CHCl<sub>3</sub> while warming from 77K to RT.  $\lambda_{\text{exc}} = 370 \text{ nm}$ .

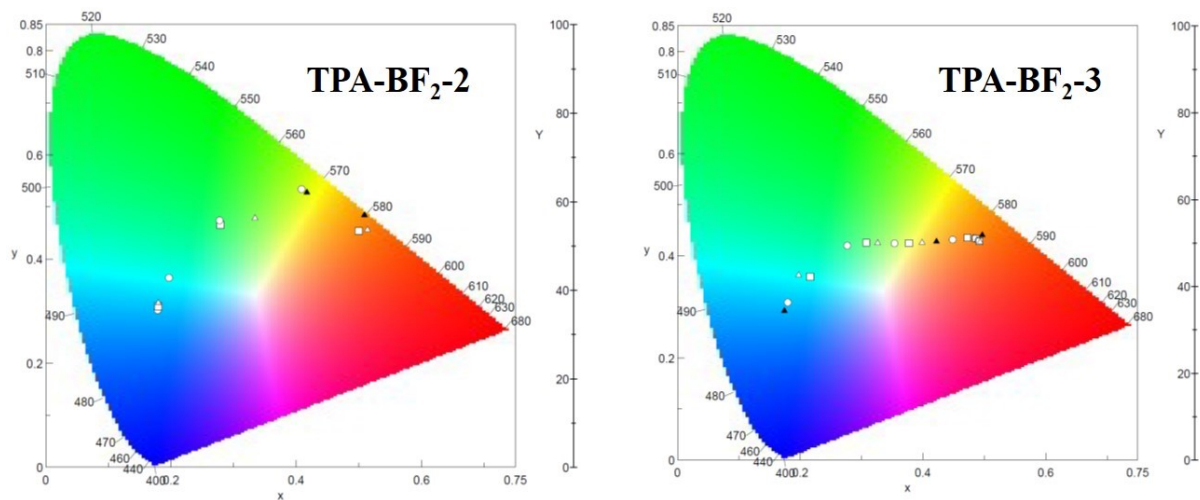

Figure S15. CIE 1931 chromaticity plot with emission colour coordinates of fluorescence tuning in  $\text{CHCl}_3$ .

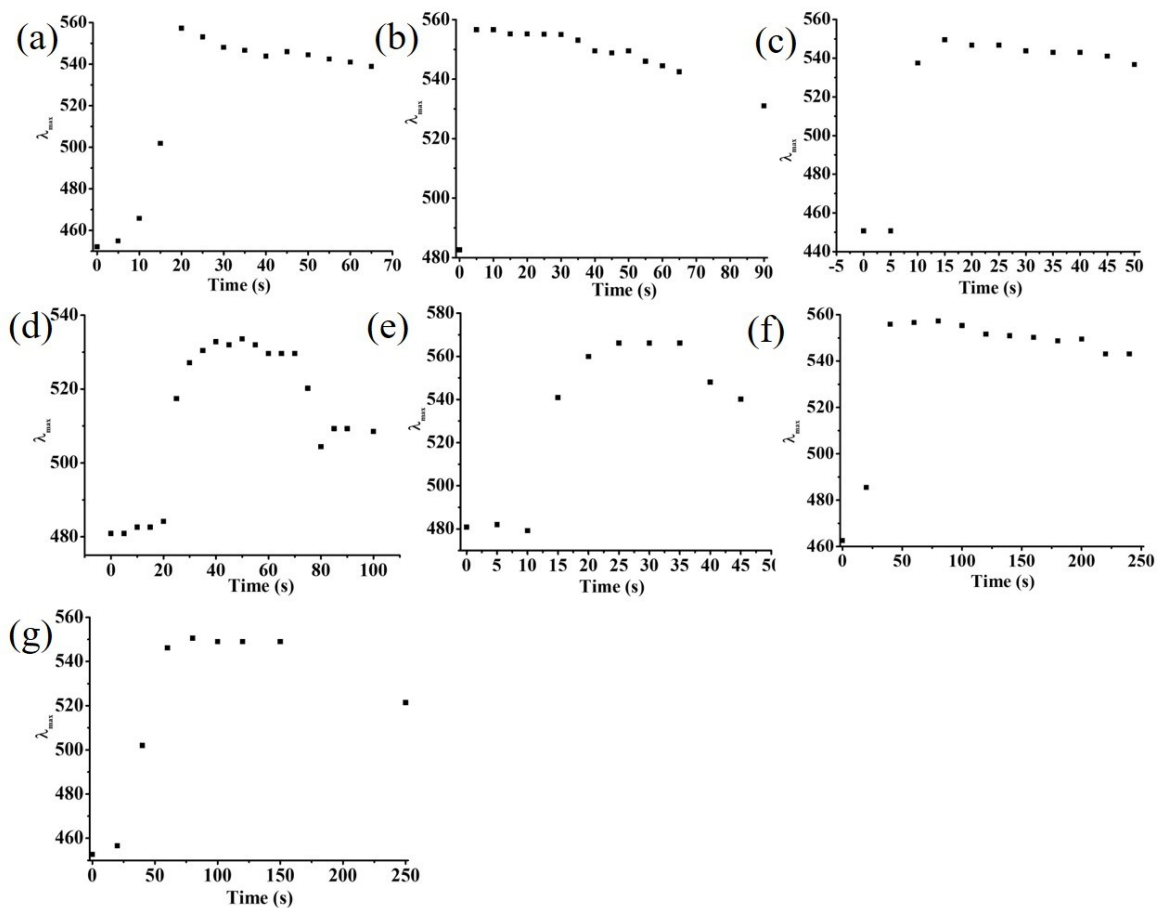



Figure S16. Fluorescence tuning of (a) TPA-BF<sub>2</sub>-2, (b) TPA-BF<sub>2</sub>-3, (c) TPA-BF<sub>2</sub>-4, (d) TPA-BF<sub>2</sub>-5, (e) TPA-BF<sub>2</sub>-6, (f) TPA-BF<sub>2</sub>-7 and (g) TPA-BF<sub>2</sub>-8 in toluene while warming from 77K to RT.  $\lambda_{exc} = 370$  nm.

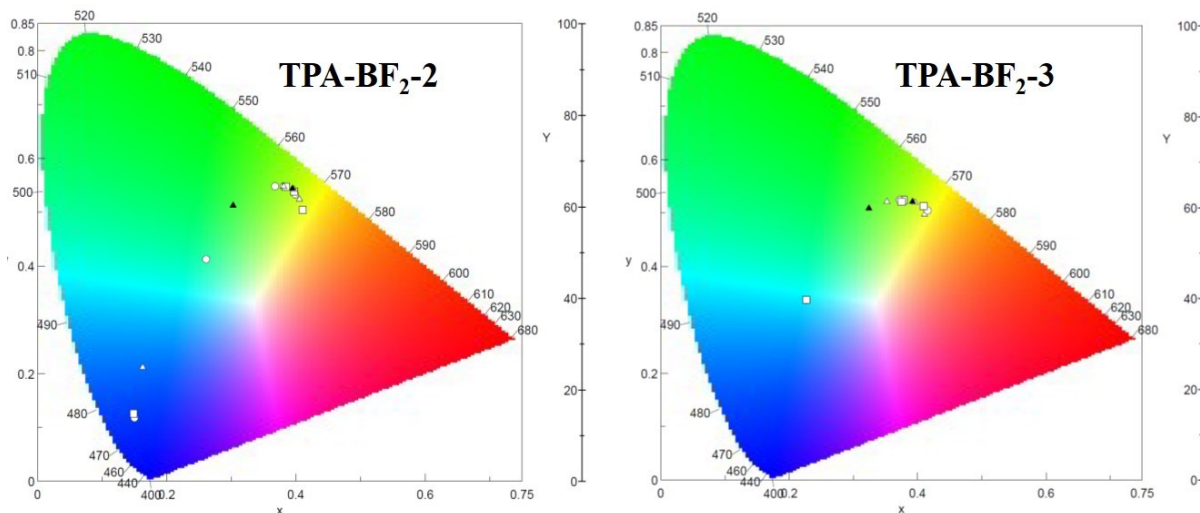

Figure S17. CIE 1931 chromaticity plot with emission colour coordinates of fluorescence tuning in toluene.

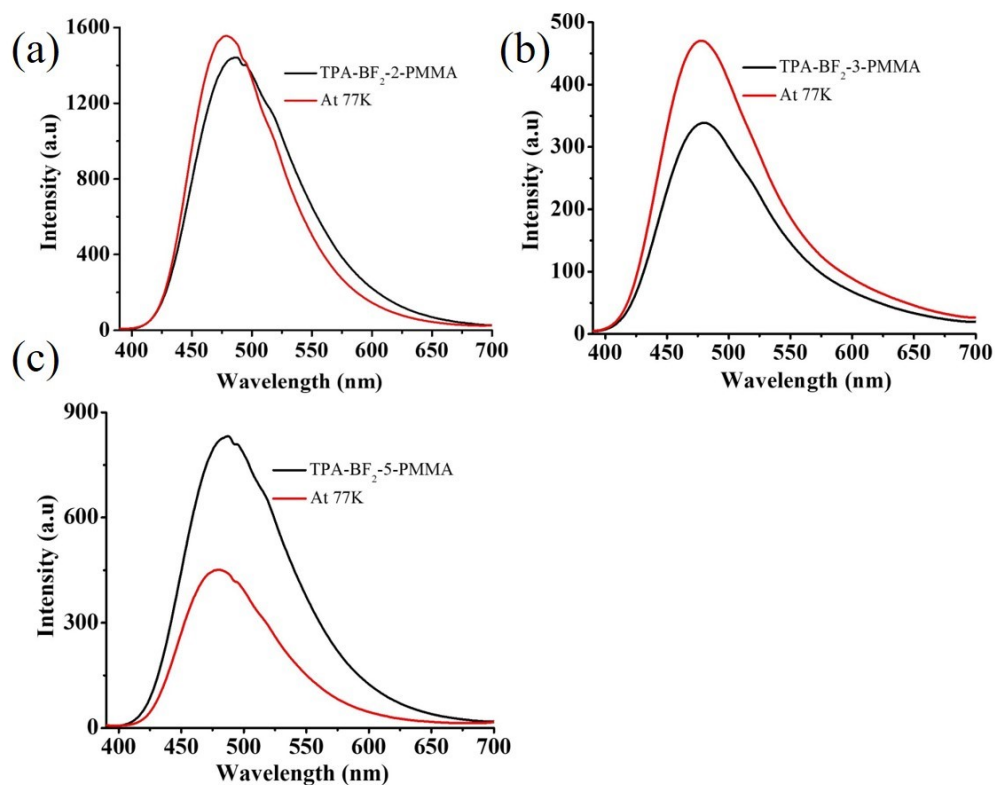

Figure S18. Fluorescence spectra of TPA-BF<sub>2</sub> in PMMA matrix at RT and 77K.

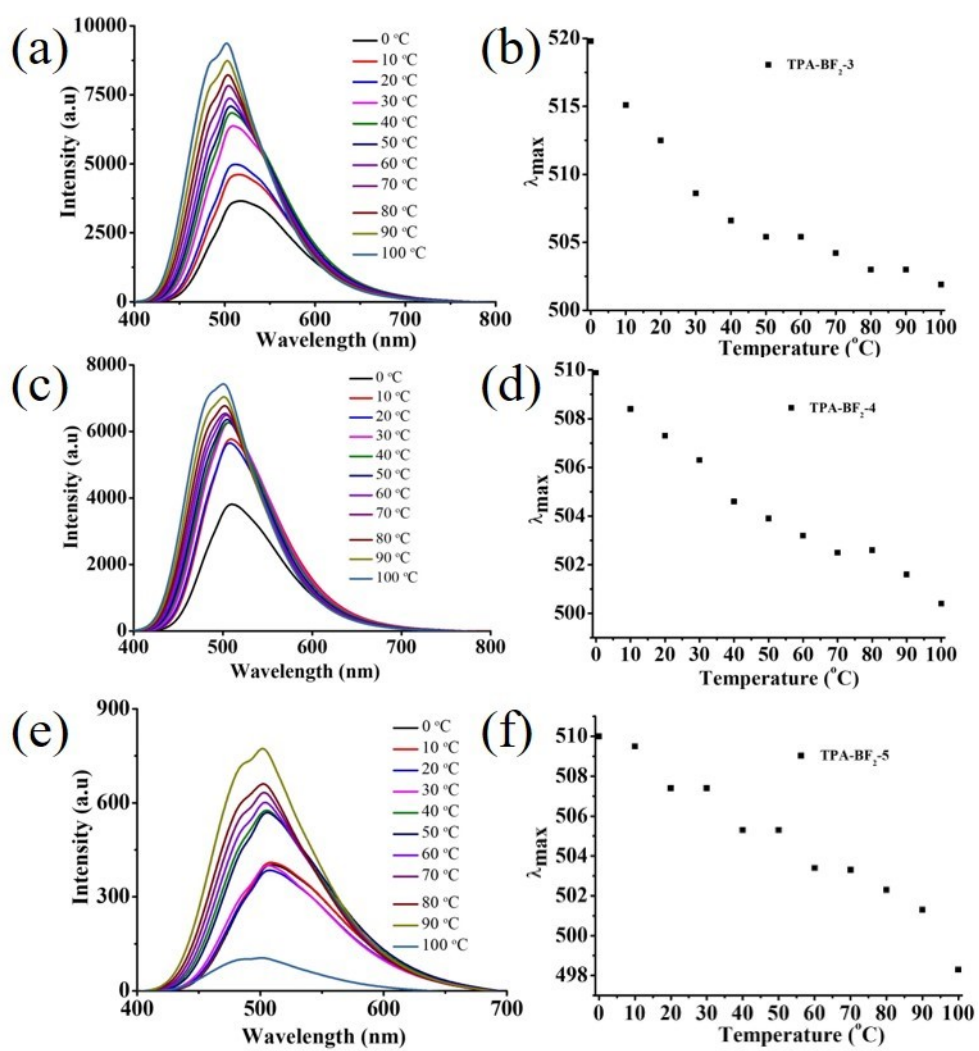

Figure S19. Thermofluorochromism of (a, b) TPA-BF<sub>2</sub>-3, (c, d) TPA-BF<sub>2</sub>-4 and (e, f) TPA-BF<sub>2</sub>-5 in toluene (Conc. = 10<sup>-5</sup> M).

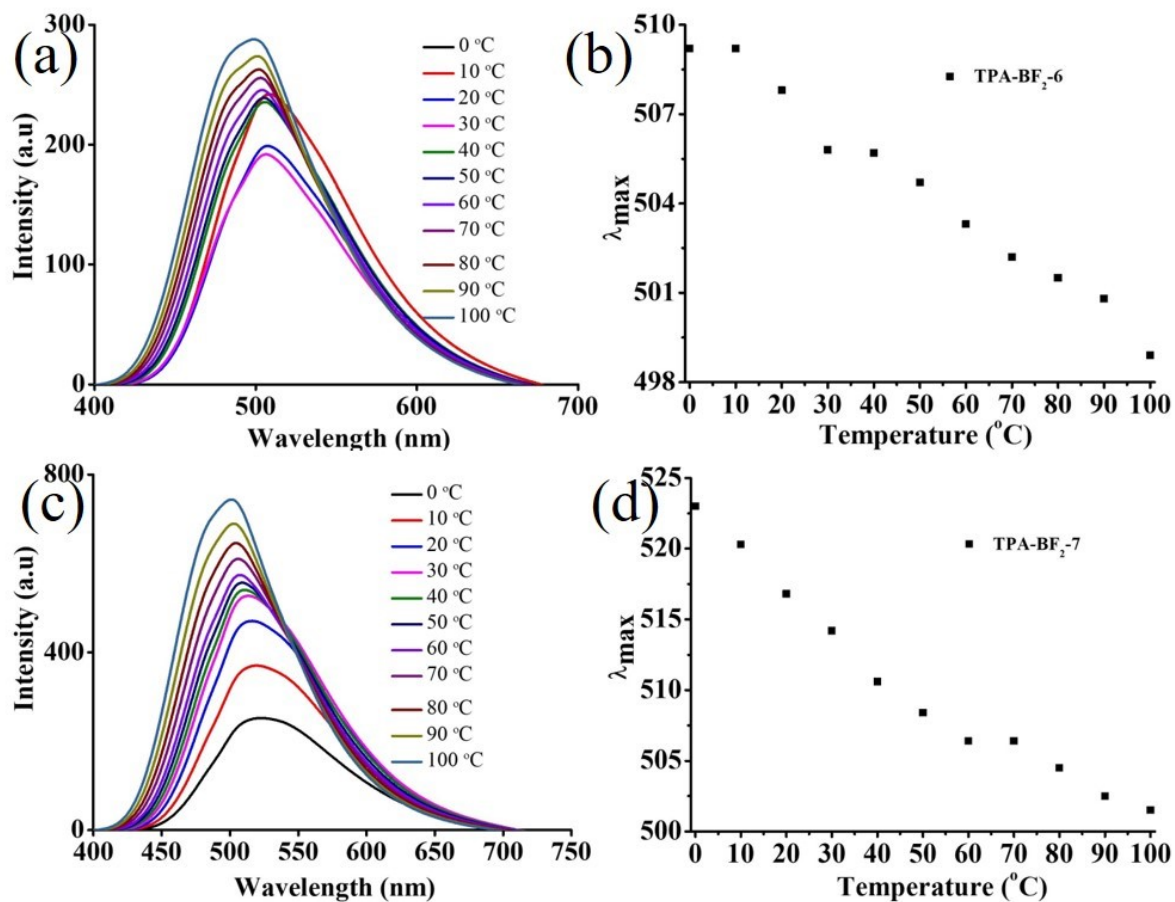



Figure S20. Thermofluorochromism of (a, b) **TPA-BF<sub>2</sub>-6** and (c, d) **TPA-BF<sub>2</sub>-7** in toluene (Conc. = 10<sup>-5</sup> M).
